1 **Autonomous induction of hepatic polarity to construct single cell liver.**

2 Yue Zhang<sup>1</sup>, Richard de Mets<sup>1</sup>, Cornelia Monzel<sup>2</sup>, Pearlyn Toh<sup>1</sup>, Noemi Van Hul<sup>3,4</sup>,

3 Soon Seng Ng<sup>5</sup>, S.Tamir Rashid<sup>5,6</sup>, Virgile Viasnoff<sup>1,7,8</sup>

4

5

6 <sup>1</sup> Mechanobiology Institute, National University of Singapore, 5A Engineering Drive 1  
7 117411 Singapore.

8 <sup>2</sup> Institut Curie, 5 rue Curie 75005 Paris. France

9 <sup>3</sup> Department of Biosciences and Nutrition, Karolinska Institutet, Stockholm, Sweden

10 <sup>4</sup> Institute of Molecular and Cell Biology (IMCB), A\*STAR, Singapore.

11 <sup>5</sup> Centre for Stem Cells and Regenerative Medicine, King's College London, London,  
12 United Kingdom.

13 <sup>6</sup> Institute for Liver Studies, King's College Hospital, King's College London, London,  
14 United Kingdom.

15 <sup>7</sup> Department of Biological Science, National University of Singapore.

16 <sup>8</sup> Centre National de la Recherche scientifique UMI 3639, 117411 Singapore

17

18

April 10, 2019

19

## 20 **Abstract**

21 Symmetry breaking of protein distribution and cytoskeleton organization is an  
22 essential aspect for development of apico-basal polarity. In embryonic cells this  
23 process is largely cell autonomous, while differentiated epithelial cells collectively  
24 polarize during epithelium formation. We report here that the *de novo* polarization  
25 of mature hepatocytes is a cell autonomous process. Single hepatocytes developed  
26 *bona fide* secretory hemi-apical lumens upon adhesion to finely tuned substrates  
27 bio-functionalized with cadherin and extra cellular matrix. The creation of this single  
28 cell liver allows unprecedented control and imaging resolution of the lumenogenesis  
29 process. We demonstrate that the density and localization of cadherins along the  
30 initial cell-cell contact acted as a key factor triggering the reorganization from lateral  
31 to apical actin cortex. Consequently, we established why hepatocytes could form  
32 asymmetric lumens in heterotypic doublets involving another ectopic epithelial cell  
33 originating from kidney, breast, or colon.

34

## 35 **Introduction**

36 The development of apico-basal polarity in epithelial cells requires signaling from the  
37 extracellular matrix as well as from cell-cell contact. The matrix/cell junction  
38 direction provides an axis of external cues along which epithelial cells break their  
39 symmetry (1-3), organize their acto-myosin cortex (4), and direct the vectorial  
40 transport of proteins (5, 6). Mechanical constrains and tension also play a role (7-9).  
41 The segregation of membrane proteins between apical, basal, and lateral poles are  
42 also ensured by the fencing activity of tight junctions as well as by the antagonist  
43 pathways of the polarity complexes (Par1/Par2, Par3/Par6/aPKC, Crumbs and  
44 Scribble complexes). The situation differs in the early embryo when single cells can  
45 polarize in the absence of external cues. In single cell *C.elegans* embryo, Par 1 and  
46 Par 3 complexes segregate based on antagonist kinase activity (10, 11) and acto-  
47 myosin cortical flow (12). In mouse embryo, blastocysts develop apical poles (13, 14)  
48 in the absence of extracellular matrix interactions in a fully cell autonomous manner  
49 (15, 16). Over activation of LKB1 in single epithelial cells was also reported to  
50 stimulate the creation of a border brush with a partial localization of the polarity

51 complexes (17). The question then arises whether *de novo* establishment of epithelial  
52 polarity is a cell autonomous response triggered by external cues or a collective  
53 response associated to the concomitant development of polarity in neighboring  
54 cells. Usual epithelial models (tissue, cell monolayer, or cysts) inherently fail to  
55 address this question. Considering a cell polarizing in these multi-cellular contexts,  
56 the concomitant reorganization of cell-cell contacts of the neighboring cells can act  
57 as a polarization cue and as a response to its polarization establishment.

58 This study presents a novel model where single primary hepatocytes develop  
59 independent *bona fide* secretory apical poles when grown in synthetic  
60 microenvironments. In this context, we demonstrate for the first time that *de novo*  
61 apical lumen development is a genetically controlled cell autonomous process. It  
62 depends mainly on actin cortex rearrangements triggered by the biophysical  
63 properties of the cadherin-mediated adherens junction along the initial lateral cell-  
64 cell contact. Subsequently, we demonstrate that, hepatocytes can form functional  
65 lumen with a whole variety of epithelial cells. In particular, we show that mature  
66 hepatocytes can polarize with immature hepatocytes during the differentiation  
67 process.

68

## 69 **Results:**

70 We investigated the *de novo* lumenogenesis of bile canaliculi to test if the apical  
71 polarity development is a cell autonomous process triggered by simple cues sensed  
72 by the cell along the non-polarized initial cell-cell contact. We used hepatocytes at  
73 different maturation stages during differentiation. Mature hepatocytes develop  
74 intercellular secretory apical lumen called bile canaliculi, connecting the hepatocytes  
75 to the biliary system. They consist of small, elongated tubules (2  $\mu\text{m}$  in diameter)  
76 sealed by tight junctions and extending between two adjacent cells (**Figure 1a**). Bile  
77 salt transporters (eg: BSEP) and ion pumps (eg: MRP2) accumulate at the apical  
78 membrane to secrete bile into the lumen. We differentiated hiPSCs (human induced  
79 pluripotent stem cells) over 25 days (18, 19) into hepatocytes lineage during which  
80 the hepatoblast-to-hepatocyte differentiation took 6 days in vitro (20). During this  
81 hepatic lineage induction, we observed a mixed population of cells at different  
82 maturation stages (21). To assess hepatocyte maturity, we used the expression levels

83 and localization of a small organic anion transporter MRP2 (Multidrug resistance-  
84 associated protein 2). A mixed population of mature and immature hepatocytes was  
85 plated in micro-fabricated cavities bio-functionalized with fibronectin (see protocol).  
86 We previously established that such cavities forced cell-cell contacts to enable lumen  
87 formation (9). We found that homotypic junction between two mature, MRP2  
88 positive hepatocytes expectedly developed a canaliculus (**Figure 1a**). The lumen  
89 displayed a symmetric accumulation of MRP2 exclusively at their apical membrane.  
90 The apical pole from both cells displayed characteristic actin enrichment. The lumens  
91 were inflated due to the proper localization of tight junctions at their edges (**Figure**  
92 **1a**). We also observed a sizeable fraction (40%±5) of heterotypic junctions between  
93 mature and immature hepatocytes (MRP2<sup>+</sup> / MRP2<sup>-</sup> cells). They displayed strikingly  
94 asymmetric apical lumens (**Figure 1a**). The luminal membrane of the mature  
95 hepatocyte (MRP2<sup>+</sup>) was identical to the canaliculus formed in homotypic junctions  
96 between mature hepatocytes. By contrast, the membrane of the immature  
97 hepatocyte (MRP2<sup>-</sup>) lacked actin enrichment and was hardly curved. However, tight  
98 junctions, as shown by the presence of ZO1, properly sealed the edges of the  
99 asymmetric lumens (**Figure 1a** and **Supplementary Figure 1a**). The asymmetric apical  
100 arrangement of canaliculi suggested that the nature of the cell adjacent to a mature  
101 hepatocyte might not be critical for the hepatocyte to establish apical basal polarity.  
102 To further test this hypothesis, we induced heterotypic contacts between primary  
103 rat hepatocytes (22, 23) and epithelial cell lines derived from various species and  
104 organs: EPH4, a murine breast cell line, Madin Darby Canine Kidney cells (MDCK), a  
105 dog kidney cell line and Caco2, a human colorectal adenocarcinoma cell line.  
106 Monolayer co-cultures of these cell lines lead to spontaneous segregation of the  
107 population. However, constraining the cells in microcavities (25x25x25µm) favored  
108 the establishment of stable heterotypic contacts. A large number of lumens formed  
109 along these heterotypic contacts. They presented the proper localization of the  
110 respective apical markers for each cell type (MRP2 for the hepatocytes, GBP35 for  
111 MDCK, **Figure 1b** and **Supplementary Figure 1b**). All luminal membranes exhibited  
112 microvilli. ZO1 also localized at the lumen edge indicating a normal polarized state  
113 for both cells. The large inflation of the lumen revealed an efficient paracellular  
114 barrier and the development of transluminal osmotic gradients.



115 This result demonstrated that the development of interspecific lumens occurs in the  
116 absence of inhibitory mechanisms. It supports the hypothesis that apico-basal  
117 polarity develops stably upon response to signaling cues ubiquitous to epithelial cell  
118 types. In the heterotypic doublets, the organization of the tight junctions was  
119 nonetheless symmetrical. We thus could not decipher if the polarity is triggered  
120 autonomously based on cues present at the initial cell-cell contact, or if it requires  
121 the concomitant organization of both cells in a coordinated manner.

122 We then tested if single hepatocytes could autonomously polarize in absence of  
123 polarizing neighboring cells. To this end, we first cultured and fixed  
124 (paraformaldehyde 4%) MDCK monolayers at 65% confluence and used them as an  
125 “inert” substrate to culture fresh primary rat hepatocytes (Material and Methods). A  
126 substantial fraction of single hepatocytes (~50%) developed unusual accumulation of  
127 actin filaments or actin rings at the interface between the MDCK monolayer and the  
128 hepatocytes (**Figure 1c**). ZO1 accumulated around these actin rings. We reasoned  
129 that these structures could constitute the basis of a polarized domain that self-  
130 organized upon the engagement of hepatocytes in an E-cadherin mediated contact  
131 with the fixed MDCK.

132

133 To test this hypothesis we reconstituted cell-cell and cell-matrix interactions *in vitro*  
134 using biofunctionalized substrates enabling precise control of the interaction and  
135 high-resolution imaging. We screened various environmental conditions  
136 (**Supplementary Figure 2a**). On 700 $\mu\text{m}^2$  circular islands coated with fibronectin,  
137 single hepatocytes spread and organized their actin cytoskeleton around the pattern  
138 showing no sign of polarity, and this irrespective of whether the culture medium was  
139 supplemented with 6% Matrigel. On identical islands coated with E or N cadherins,  
140 single cells developed central actin rings at the interface with the substrate only for  
141 Matrigel supplemented medium (**Supplementary Figure 2b**). Note that Hepatocytes  
142 express equally E and N-Cadherins (24). MRP2 was recruited within the membrane  
143 area delineated by the actin ring. Similar results were obtained for primary mouse  
144 hepatocytes (**Supplementary Figure 2c**).

145 We further tested if the inner ring membrane was a functional secretory apical pole  
146 as suggested by the localization of the anion transporter MRP2. Confocal imaging did

147 not reveal any convincing detachment of the membrane from the substrate  
148 suggesting either a hemi-luminal cavity below optical axial resolution (around  
149 700nm) or a collapse during fixation. We thus used Reflection Interference Contrast  
150 Microscopy (RICM) to measure the nanoscale distance between the substrate and  
151 the plasma membrane in label-free living cells (25). This revealed (**Figure 2 a**) that  
152 the membrane enclosed by the actin rings had a concave shape on average. The  
153 membrane pulsated up and down at mean period of 6min/pulse. (N=9). The hemi-  
154 lumen reached maximal heights of  $170\pm 5$  nm (N=25). Upon partial inhibition of bile  
155 salt synthesis by  $10\mu\text{M}$  Ketoconazole, the lumen period increased by to fold to 12  
156 min/pulse. It also enhanced lateral fluctuations of the intraluminal membrane as  
157 compared to the concentric axial pulsation observed in control case (**Figure 2a** and  
158 **Supplementary movies 1-2**). Additionally, actin filaments no longer formed a  
159 characteristic ring but remained structured as a patch in the center of the contact.  
160 We also added UDCA (Ursodeoxycholic acid,  $40\mu\text{M}$ ) to the cell culture media to  
161 stimulate bile secretion, which resulted in three-fold increase ( $633\pm 54\text{nm}$  N=16) in  
162 lumen maximal height. The central lumen was largely inflated as demonstrated by  
163 the multiple circular interference fringes along the lumen. Our data strongly  
164 suggested that the hemi-lumens formed between hepatocyte and cadherin-coated  
165 micropattern were functional and recapitulated the pulsatile behavior of canaliculi  
166 observed *in vivo*. The small level of inflation of the lumen (around 200nm as  
167 compared to 2 to 5  $\mu\text{m}$  *in vivo*) could be explained by the expected large paracellular  
168 leak resulting from a contact with the substrate that is established exclusively by  
169 cadherins and likely lacking tight junctions. We then tested the extent to which the  
170 spatial self-organization of junctional and polarity markers resulting solely from E-  
171 cadherin adhesion mimicked the organization of true canaliculi. **Figure 2b** shows the  
172 positions of cellular cadherin, ZO1/ZO2, Par-3, Claudin-3, Myosin IIA, MRP2 relative  
173 to the actin ring. The stereotypical shape of the ring enabled the computation of the  
174 average localization map (**Figure 2c** and **Supplementary Figure 3**) for each protein  
175 (**Material and Methods**). From this map we found that myosin II microfilaments  
176 accumulated strongly along the ring. Structured illumination microscopy  
177 (**Supplementary Figure 7**) revealed their radial orientation across the orthoradial  
178 actin fibers constituting the ring, strongly suggesting that the ring is highly

179 contractile. ZO1/ZO2 and Par3 accumulated precisely at the edge of the actin ring  
180 (**Figure 2b,c**). Cellular cadherin (**Material and Methods**) was absent from the central  
181 region of the ring, accumulated  $1.5 \pm 0.5 \mu\text{m}$  away from the outer edge of the ZO1-  
182 ZO2-Par3 ring and was diffusively present along the rest of the contact with the  
183 substrate. We concluded that proper lateral, junctional, and basal domains  
184 developed at the contact with the substrate as pictured on **Figure 2d**. Note however  
185 that the different concentric rings extend laterally over  $2 \pm 0.5 \mu\text{m}$ . In canaliculi  
186 formed between 2 cells, the peri-canalicular acto-myosin ring was smaller than 2  
187 microns, and ZOs and Par3 localized around a 200-300 nm away from the actin belts  
188 (26). Additionally, the main trans-membrane tight junction proteins claudin3 and 1  
189 and occludin did not show specific accumulation on any membrane region, indicating  
190 a lack of structuration of the transmembrane components of the tight junction  
191 components (**Supplementary Figure 3a**). The minimalistic cues provided by our  
192 system not only polarized the cortical and membrane components at the contact but  
193 also structured the position of the Golgi. 3D reconstitution following Grasp65  
194 staining (**Supplementary Figure 3b**) revealed that the Golgi was located precisely  
195 (95% overlap N=40, **Material and Methods**) over the actin ring region. It extended  
196 vertically to reach the nucleus independently of the position of the nucleus in the  
197 cells. Although it was previously reported that cadherin and integrins are necessary  
198 to elicit the development of apical poles (2, 3), in our model the polarity developed  
199 without cell division (as in classical type of approaches (27)) and by a single cell in  
200 contact with an inert substrate. Taken together, we established that combining static  
201 cadherin and extracellular matrix adhesions is sufficient to induce a fully polarized  
202 protein distribution which phenocopied the apico-basal polarization of hepatocytes  
203 (except for occludin and claudins) (**Figure 2d**). Our data demonstrated that polarity  
204 program in mature hepatocytes is fully autonomous and does not require the  
205 response of the neighboring cells past the initial induction by E-cadherin contact.

206

207 We then established the time sequence of events leading to the  
208 development of apico-basal polarity after it was triggered by mere E-cadherin  
209 contact. We classified the development of the hemi-lumen into five phases based on

210 the different prevailing acto-myosin structures imaged by structured illumination  
211 microscopy, SIM (**Figure 3**).

212 *Phase 1: 3h pre matrigel induction.* Cells first adhered to the E-cad patterns. During  
213 this phase an acto-myosin ring accumulated at the cell edge. Cadherins and ZO1 co-  
214 localized with the ring. Other markers showed no specific localization.

215 *Phase 2: 0h to 4h post induction.* Disorganized actin fibrils developed at the center of  
216 the cell contact with the substrate. Myosin IIA and ZO-1 were recruited along these  
217 fibers. Par3 accumulated diffusively in the central region.

218 *Phase 3: 4h to 7h post induction.* A diffuse acto-myosin patch developed in the  
219 center of the cells (50% cases , N=56). ZO1/2 accumulated at the outer edge of the  
220 patch into a discontinuous ring. Par3 and MRP2 localized diffusively over the patch.  
221 Cadherin attachment to the substrate remained homogenous across the whole  
222 contact area.

223 *Phase 4: 7h to 14h post induction.* The acto-myosin patch densified into a  
224 disorganized central region surrounded by radial fibers. Myosin was largely recruited  
225 on the disorganized patch (**Supplementary Figure 7**). Cadherin detached from the  
226 underlying substrate beneath the central patch region. Polarity markers (ZO1-2,  
227 Par3) were densely recruited around the interface between the patch and the radial  
228 fibers. MRP2 accumulated within the central patch region.

229 *Phase 5: 14h post induction.* Hepatocytes developed the ring phenotype described  
230 previously (**Figure 2**) with 85% occurrence rate (N=72). Note that ZO1/2 were fully  
231 excluded from the edge of the cell. The transition from Phase 4 to Phase 5 was  
232 suppressed by inhibition of myosin II or bile secretion (**Supplementary Figure 4**),  
233 strongly suggesting that the transition from actin patch to actin ring was  
234 mechanically driven by acto-myosin contractility and osmotic gradients.

235 We then tested if this time sequence of events is compatible with the development  
236 of real lumens between two cells. We performed 3D SIM imaging of different  
237 development stages on the canaliculi (**Supplementary Figure 5**). They displayed  
238 gradual accumulation of a denser actin cortex (300 nm thick) at the center of the  
239 contact and the gradual relocalization of ZO1 and Par 3 from the contact edge to the  
240 lumen edge. Lumen inflation occurred in multiple locations along the actin dense  
241 patch. We attributed this effect to the maturation of tight junctions concomitant to

242 the disengagement of adherens junctions. This leads to the local development of  
243 micro lumens that eventually merged into one lumen. We concluded that the  
244 process of canaliculi development *in vivo* and in our reductionist single cell liver  
245 follow a very similar sequence of events. The time sequence of events we observed  
246 also share similarities with what has been described as pre-apical actin patches (PAP)  
247 and Apical Membrane Initiation Sites (AMIS) (4, 28) in MDCK doublets. However, in  
248 our case the actin structure formed *in vivo* is far more localized at the membrane  
249 than what is reported for MDCK PAP (4).

250

251 We then determined how the density and spatial arrangement of cadherin regulates  
252 lumen formation. We first modulated the total amount of cadherin adhesion by  
253 changing the shape and size of the pattern while keeping cadherin density constant.  
254 Independent of the pattern's shape and size (**Supplementary Figure 6**), lumens  
255 formed with identical rate of occurrence, and remained circular with an area of  $200$   
256  $\mu\text{m}^2 \pm 60$ . Unconstrained hepatocytes left to spread on un-patterned homogeneously  
257 coated cadherin substrates also polarized. These lumens were more irregular in  
258 shape, and could reach an area of  $600 \mu\text{m}^2$  for very large contacts ( $2400 \mu\text{m}^2$ ). We  
259 concluded that in our reductionist approach the lumen size and shape were largely  
260 decoupled from the size and shape of the cadherin contact area.

261 Next, we varied cadherin density on the  $30 \mu\text{m}$  circular pattern (**Material and**  
262 **methods**). **Figure 4a** shows that at low cadherin densities the hepatocytes did not  
263 attach. As the cadherin density increase the number of hepatocytes adhering to the  
264 substrate continuously increased, however the occurrence of lumen formation  
265 peaked significantly at a coating density of  $10 \mu\text{g}/\text{ml}$  cadherin. Lower and higher  
266 cadherin densities proved less efficient in prompting lumen formation suggesting  
267 that there is an optimal density of cadherin for triggering apical surface  
268 development. We used western blotting to assess the quantity of cadherins. In  
269 ascending expression levels, the cell lines ranked as MDCK < Eph4 < Caco2  
270 (**Supplementary Figure 1b**). In the heterodoublets the probability of asymmetric  
271 lumens formation was inversely correlated with the amount of cadherin. MDCK cells  
272 had the lowest expression levels of cadherin and proved the most efficient in  
273 creating heterolumens. We then overexpressed E-cadherin in Eph4 cells (Eph4<sup>+</sup>) to

274 reach the expression level found in Caco2 cells. It resulted in a lower occurrence of  
275 lumen formation matching that matching Caco2 heterodoublets (**Figure 4a**). We thus  
276 concluded that apical pole formation requires a fine balance of cadherin adhesion.  
277 On one hand it should allow cell-cell contact and on the other hand should not over-  
278 stabilize it. This parameter appears to be key for the ability of hepatocytes to  
279 develop mature lumens with their adjacent neighbors. We then tested if the spatial  
280 distribution of cadherin also affected lumen formation. We seeded our single  
281 hepatocytes on circular cadherin patterns (30  $\mu\text{m}$   $\odot$ ) containing an antifouling  
282 coating in their central region (15  $\mu\text{m}$   $\odot$ ). On the center of these doughnut patterns,  
283 we matched the size of the non-adhesive region to the average size of lumens  
284 formed on disc patterns (**Figure 4b**). All these hepatocytes failed to form a secretory  
285 hemi-lumen, and the membranes remained suspended over the non-adhesive part  
286 of the lumen as demonstrated by the random and stochastic fluctuations probed by  
287 RICM live imaging (**Supplementary Video 4**). On average, this resulted in a flat top-  
288 hat profile of the membrane height as compared to the dome shape profile  
289 observed when lumens formed (**Figure 4b**). The actin structure remained cortical  
290 with no radial fibers (**Figure 4c**), and never developed into a ring. ZO-1 and Par-3  
291 relocated to the central zone but did not organize along the contour of actin patch  
292 (**Figure 4c**). These data suggested that the local adhesion of cadherins at the center  
293 of the contact was essential for polarity establishment. Correlatively, signaling from  
294 cadherins outside the future luminal area was not sufficient to trigger the formation  
295 of apical poles. We concluded that the lumen development originated from the local  
296 engagement of cadherins rather than from an integrated signal over the whole  
297 contact.

298 We reasoned that the development of actin fibers (P2 phase) and the subsequent  
299 diffuse actin patch (P3 phase) from an actin poor contact area (P1 phase) was an  
300 essential process in the subsequent self-organization of the apical pole. To test this  
301 hypothesis we impaired the development of the fibers while still maintaining the full  
302 capacity of the hepatocytes to self-organize. We plated the hepatocytes on a  
303 substrate homogeneously coated with E-cad that was studded with small  
304 topographical features (comprising of pillars or a grid with dimensions ranging from  
305 2 $\mu\text{m}$  to 500 nm in width, and 800nm in height, **Material and Methods**). Hepatocytes

306 were able to attach to such substrates, spreading on and in-between the  
307 topographical features. Despite the homogeneous E-cadherin coating, all the feature  
308 types tested resulted in inhibition of the development of P2 like actin fibers (**Figure**  
309 **4d**). Actin accumulated around each topographical feature fully coated with E-  
310 cadherin.

311 Upon addition of matrigel, most of the actin failed to restructure and remained  
312 largely “clamped” by the topography. This resulted in a drastic reduction of  
313 hepatocytes with a polarized phenotype (75% polarization in the absence of  
314 features, compared to 20% polarization on micropillars, 25 % on nanopillars, and  
315 15% on nanogrids, **Figure 4d**). The few polarized cells (discriminated by an actin  
316 structure surrounded by ZO1 and Par3) exhibited a much smaller apical area (2~20%  
317 vs 8~30% for control)(**Figure 4e**). Independent of the apical pole size, MRP2 perfectly  
318 overlaid the actin structure. However, in the non-polarized phenotypes, MRP2 was  
319 diffusively recruited at the contact with the substrate (**Figure 4d,e**). Our data  
320 demonstrated that the self-organizing process of the cell autonomous hepatic  
321 polarity development was orchestrated by the ability of the actin cortex to  
322 reorganize from a suspended cortical actin structure into a loose actin meshwork at  
323 cell-cell contacts. Engagement of integrin signaling at the basal poles leads to the  
324 development of actin fibers at the apical pole. The development of the incorrect  
325 actin structure (either by physical impairment or by local absence of cadherin  
326 adhesion) led to the inhibition of the apical pole development and all subsequent  
327 polarity development.

328

329 In conclusion, we have established a novel single cell model to investigate the role of  
330 of cell-cell junction in apical basal polarity. Our data demonstrate that the  
331 development of apical basal polarity in hepatocytes is a largely cell autonomous  
332 process, independent of the nature of their epithelial neighbors. Our results strongly  
333 suggest that lumen formation can occur between mature and immature hepatocytes  
334 during development. Hepatic polarity appears as an emergent property induced by  
335 the spatially segregated contact of cadherin and ECM adhesion without any need for  
336 collective cellular response. The structural and mechanical properties of the actin  
337 cortex at the lateral contact acts as a switch triggering the development of the apical

338 pole. The density and spatial distribution of cadherins at the initial cell-cell junction  
339 largely regulates the development of an apical actin cortex that in turn drives the  
340 polarized organization of the whole cell including that of the Golgi apparatus.

341 Our reductionist approach demonstrate that single hepatocytes can be fooled into a  
342 polarized state by artificial microniches and thus constitutes, as far as bile secretion  
343 is concerned, the first realization of a single cell liver.

344

345

346



347 **Methods:**

348 **Microwell fabrication**

349 Microwells with dimensions of 25 $\mu$ m in diameter and 25 $\mu$ m in height were  
350 fabricated using an established method (29). The functionalization of the microwell  
351 top, side, and bottom surfaces was achieved by coating with 10 $\mu$ g/ml fibronectin  
352 (Sigma, P1141) for 1hour, followed by flipping into a fibronectin coated coverslip to  
353 passivate the new-top surface with a solution of 0.2% pluronic acid (Sigma, P2443-  
354 250G).

355

356 **Generation of Micropatterned substrates**

357 The 2D patterns were generated by microserigraphy method (30). 100 $\mu$ l of 10  $\mu$ g/ml  
358 fibronectin or E-Cadherin (R&D System, 8875-EC) was applied to a 2X2 cm NoA 74  
359 membrane on a polymer bottom dish (ibidi, 81156), and incubated overnight at 4°C.  
360 The membrane was peeled off right before usage and the dish was treated with 0.2%  
361 pluronic acid for 30min at RT.

362 Employing the Alveole PRIMO system, E-Cadherin coated doughnut patterns were  
363 produced as recommended by the vendor. 10 $\mu$ l of 100 $\mu$ g/ml E-Cadherin solution  
364 was applied to each PDMS stencil, incubated for 2 hours at room temperature  
365 before rinsing with PBS 3 times. The dish was then treated with 0.2% pluronic acid  
366 for 30min.

367

368 **Topographical obstacles fabrication:**

369 Replicas of silicon molds containing the different features (750nm in height) was  
370 made by double-casting PDMS (mixed at 10:1 base and curing agent, Sylgard184,  
371 Dow Corning) cured at 80°C for 3 hours, passivated overnight at low pressure with a  
372 solution of Trichloro(1H,1H,2H,2H-perfluorooctyl)-silane (Sigma, 448931).

373 The textured substrates were generated by UV curing (6 min ,185 and 253nm,  
374 30mW/cm<sup>2</sup>, UVO Cleaner 342-220, Jelight) a drop of low refractive index polymer  
375 premix (MY134, MyPolymers), sandwiched between a glass coverslip and the PDMS  
376 mold, and immersed in water. After peeling off the mold, the features were coated  
377 overnight with 10 $\mu$ g/ml E-cadherin solution (RnD, 8875-EC-50) in PBS at 4°C and  
378 washed twice with PBS before cell seeding.

379

### 380 **hiPSC differentiation, seeding and culturing**

381 hiPSC-derived hepatic progenitor or hepatocyte-like cells were generated using an  
382 established protocol (18, 19, 31). To generate heterodoublets of iPSC-derived  
383 hepatocytes at mature and immature stages, hepatocyte-like cells after 25 days of  
384 differentiation were detached and suspended in Hepatozyme medium (Thermo,  
385 17705021), supplemented with Oncostatin M 0.01 mg/ml (Bio-Techne, 295-OM-050)  
386 and Hepatocyte Growth Factor 0.05 mg/ml (Peprotech, 100-39-100) to reach a final  
387 cell density of  $0.5 \times 10^6$  cells/ml. Approximately 1 ml cell suspension was then  
388 pipetted onto microwells in a 35mm glass bottom dish and placed in an incubator for  
389 at least 2 hours to allow cell attachment. Extra cells that were not trapped in the  
390 wells were removed by rinsing the dish with PBS buffer. The system was then  
391 replenished with fresh culture medium. Cells were left in 5% CO<sub>2</sub> at 37°C and 95%  
392 humidity for 1 day to develop polarity.

### 393 **Hepatocyte isolation, seeding and culturing**

394 Hepatocytes were isolated from male Wistar rats by a two-step in situ collagenase  
395 perfusion method, as previously published (32). Animals were handled according to  
396 the IACUC protocol approved by the IACUC committee of the National University of  
397 Singapore. With a yield of  $>10^8$  cells/rat, hepatocyte viability was tested to be  $>90\%$   
398 by Trypan Blue exclusion assay.

399 In order to co-culture primary rat hepatocytes with another epithelial cell line, e.g.  
400 MDCK, EpH4, Caco2 in a microwell array, freshly isolated rat hepatocytes (0.5  
401 million) were seeded onto the microwell in the glass bottom dish and cultured in 2  
402 ml of William's E culture medium supplemented with 2 mM L-Glutamine, 1 mg/ml  
403 BSA, 0.3 µg/ml of insulin, 100 nM dexamethasone, 50 µg/ml linoleic acid, 100  
404 units/ml penicillin, and 100 mg/ml streptomycin (Sigma-Aldrich). After 1 hour  
405 incubation, the floating hepatocytes were removed by washing with PBS buffer and  
406 culture medium were replenished. 0.5 million MDCK cells expressing histone-GFP  
407 (generous gift from Dr Benoit Ladoux, Institut Jacques Monod, Paris), EpH4 or Caco2  
408 cells stained with CellTracker™ Green CMFDA Dye (ThermoFisher, C2925) following  
409 manufacturer's instruction were subsequently detached and seeded into the  
410 microniches. After 1 hour incubation, excess cells were removed and culture

411 medium were replenished. The system was left in incubator for 24 hours to develop  
412 polarity.

413 For micropatterning experiments, 0.5 million rat hepatocytes were added onto E-  
414 Cadherin coated micropatterns in a 35mm glass bottom dish and cultured in 2ml of  
415 William's E medium with all seven supplements as described before. Cells were  
416 incubated with 5% CO<sub>2</sub> at 37°C and 95% humidity. After a 3-hour incubation, the  
417 system was rinsed with PBS medium to remove hepatocytes that did not attach to  
418 the micropatterns. The petri dish was subsequently replenished with fresh culture  
419 medium. 3-hours later, the culture medium was replaced by medium supplemented  
420 with 6% matrigel. The matrigel was handled according to the protocol as described  
421 previously[Martin-Belmonte, 2013]. The system was then left in incubator for 24  
422 hours.

423

#### 424 **Pharmacological treatment**

425 To inhibit actomyosin contractility or block bile acid synthesis, culture medium  
426 supplemented with blebbistatin (50µM in DMSO; Merck, 203390) or ketoconazole  
427 (10µM in DMSO; Sigma, K1003) was administered 7 hours after matrigel overlay until  
428 cell fixation. To stimulate bile acid secretion, Ursodeoxycholic acid (UDCA, 50µM in  
429 DMSO; Sigma, U5127) was added at the same time as the matrigel overlay.

430

#### 431 **Immunostaining and image acquisition**

432 Cells were fixed with 4% paraformaldehyde (PFA) for 30 minutes at 37°C. After  
433 fixation, the cells were rinsed with PBS and permeabilized for 30 min in PBST (0.1%  
434 Triton-X diluted in TBS). Permeabilized cells were blocked with 5% BSA diluted in PBS  
435 for 4 h at 4°C and incubated overnight with pan-Cadherin antibody (Sigma, C1821,  
436 1:500), MRP2 antibody (Sigma, M8316, 1:200), Par-3 antibody (Millipore, 07-330,  
437 1:200), ZO-1 antibody (Life Technology, 61-7300,1:100), ZO-2 antibody  
438 (ThermoFisher, 38-9100, 1:100), Claudin-1 antibody (Invitro, 717800, 1:100),  
439 Claudin-3 antibody(Abcam, ab15102, 1:40), Occludin antibody (Invitrogen, 711500  
440 1:200), MyosinIIA antibody (Sigma, M8064, 1:200), Grasp65 antibody(Abcam,  
441 ab102645, 1:200) at 4°C as instructed in the manufacturer's protocol. After rinsing  
442 with PBS, cells were incubated with secondary antibodies (Alexa Fluor 546 Donkey

443 Anti-Rabbit IgG, A10040 and Alexa Fluor 647 Donkey Anti-Mouse IgG, A-31571, Life  
444 Technologies, 1:200) and Alexa Fluor 488 Phalloidin (Life Technologies, A12379,  
445 1:200) or ATTO-565 Phalloidin (Sigma 94072, 1:500) for 1 h in dark at room  
446 temperature. After rinsing with PBS again and incubation with DAPI (Sigma, D9564),  
447 cells were mounted in mounting medium (DAKO, S3023). 3D stacks of confocal  
448 images were acquired with 60X NA1.3 water lens on a Nikon Eclipse Ti Microscope  
449 equipped with Yokogawa CSU-X1 spinning disc unit. Structured Illumination  
450 Microscopy images was acquired on the same microscope equipped with Live-SR  
451 module ( <https://www.cairn-research.co.uk/product/live-sr/>). The cells were chosen  
452 purely based on criteria of cell adhesion. Typically, more than 70% of patterns  
453 contained single cells that occupied the entire pattern, and these were selected for  
454 imaging.

455

#### 456 **RICM analysis:**

457

458 RICM analysis was performed considering the theory of partial coherent light,  
459 following the description of cell adhesion analyses reported in Limozin and Sengupta  
460 (25). Relative heights were reconstructed using the intensity-height relation

$$461 \quad I(h) = \frac{S}{2} - D \frac{\sin(y)}{2y} \cos\left(2kn_1 \left[ h \cos^2\left(\frac{\alpha}{2}\right) - h_{\text{off}} \right]\right)$$

462 where

$$463 \quad y = 2kh \sin^2\left(\frac{\alpha}{2}\right).$$

464  $k = 2\pi/\lambda$  is the wave vector for the illumination light for a wavelength  $\lambda = 546 \pm$   
465 10 nm,  $n_1 = 1.335$  is the refractive index of the outer buffer,  $S$  and  $D$  are the sum  
466 and difference of the maximal and minimal intensity in the experimental fringe  
467 pattern, respectively, and  $h_{\text{off}}$  is a phase shift arising from the reflection at different  
468 interfaces.

469 The illumination numerical aperture (INA), which is given by the half-angle of the  
470 cone of illumination,  $\alpha$ , was set to a maximum value to minimize the depth of focus  
471 and thereby to avoid reflections from organelles or other intracellular structures.  
472 The measured INA amounted to  $\text{INA} = n_1 \sin(\alpha) = 0.73$ . Cell contact areas of  
473 constant dark intensity were considered 'adhered' and of closest proximity to the

474 substrate. These areas served as starting point for the reconstruction of relative  
475 membrane heights.

476 Data were analyzed using self-written routines in Matlab (version 9.3 (R2017b), The  
477 MathWorks, Inc. MA, USA) and FIJI (version 1.52s, Rasband, W.S., NIH, Bethesda, MD,  
478 USA).

479

480

#### 481 **Image analysis**

482 To analyze the relative position of each protein, a homemade program was written  
483 with Matlab (MathWorks, Natick, Mass). The position of the lumen center was  
484 determined by using fit-circle function implemented in Matlab with a radius range  
485 lower than the cell size on the thresholded actin image by Otsu's method acquired at  
486 the membrane/substrate interface. The radial profile was then performed on every  
487 channel. The intensity profile for each cell was then aligned by normalizing the  
488 distance between the centre of the lumen and the outer point of the actin ring. This  
489 outer point was determined by finding the maximum of the second derivative of the  
490 actin intensity profile. As there was no ring formed on E-cadherin doughnut pattern,  
491 the distance was normalized between the centre of the pattern and the inner border  
492 of the adhesive area. The relative distance of the different ring was then calculated  
493 by measuring the distance between the peaks of the average curve of each staining.

494

495 To assess Golgi localization in relation to lumen position, the degree of overlay of  
496 these two structures was measured. Z direction maximum intensity projection was  
497 applied to all the stacks containing Grasp65 signal to extract Golgi structure, while  
498 projection of selected frames of Phalloidin staining at the cell/substrate interface  
499 was used to extract lumen localization. ROIs of Golgi and lumen structures were  
500 created by thresholding the corresponding Z-projection images. The ratio of the  
501 number of pixels of the intersection over that of actin mask was finally used to  
502 describe the degree of overlaying.

$$Overlay(Actin, Golgi) = \frac{Mask_{Actin} \cap Mask_{Golgi}}{Mask_{Actin}}$$

503

504 To measure the size and circularity of hemi-lumens and cells, 3 frames of phalloidin  
505 staining images at the hepatocyte/substrate interface were selected and  
506 reconstructed using maximum intensity projection. The contour of the hemi-lumen  
507 and cells was drawn manually based on F-actin signal using ImageJ. The Area and  
508 Circularity were measured with the ImageJ measurement plugin. A circularity of 1.0  
509 indicates a perfect circle. As the value approaches 0, it indicates an elongated  
510 polygon.

511

512 To evaluate the MRP2 distribution and actin structure size for hepatocytes cultured  
513 on textured substrate, selected frames imaged at the hepatocyte/substrate interface  
514 were reconstructed using maximum intensity projection. The areas of MRP2, actin  
515 structure and cells were then manually measured using ImageJ.

516

517 Statistical analysis was performed using GraphPad Prism 6  
518 (<https://www.graphpad.com/scientific-software/prism/>). The statistical significance  
519 between two groups was analyzed by Unpaired Student's t-test unless otherwise  
520 stated. In all cases, a P value of less than 0.05 was considered statistically significant  
521 and P value is specified in each captions.

522

523

524

525

526

527

528

529

530

531

532

533

534

535

536 **References**

- 537 1. H. G. Hall, D. A. Farson, M. J. Bissell, Lumen formation by epithelial cell lines  
538 in response to collagen overlay: a morphogenetic model in culture.  
539 *Proceedings of the National Academy of Sciences of the United States of*  
540 *America* **79**, 4672-4676 (1982).
- 541 2. N. Akhtar, C. H. Streuli, An integrin-ILK-microtubule network orients cell  
542 polarity and lumen formation in glandular epithelium. *Nature cell biology* **15**,  
543 17-27 (2013).
- 544 3. D. M. Bryant, J. Rognot, A. Datta, A. W. Overeem, M. Kim, W. Yu, X. Peng, D.  
545 J. Eastburn, A. J. Ewald, Z. Werb, K. E. Mostov, A molecular switch for the  
546 orientation of epithelial cell polarization. *Developmental cell* **31**, 171-187  
547 (2014).
- 548 4. D. M. Bryant, A. Datta, A. E. Rodríguez-Fraticelli, J. Peränen, F. Martín-  
549 Belmonte, K. E. Mostov, A molecular network for de novo generation of the  
550 apical surface and lumen. *Nature cell biology* **12**, 1035 (2010).
- 551 5. E. Rodríguez-Boulan, I. G. Macara, Organization and execution of the  
552 epithelial polarity programme. *Nature reviews. Molecular cell biology* **15**,  
553 225-242 (2014).
- 554 6. A. E. Rodríguez-Fraticelli, F. Martín-Belmonte, Methods for analysis of apical  
555 lumen trafficking using micropatterned 3D systems. *Methods in cell biology*  
556 **118**, 105-123 (2013).
- 557 7. A. E. Rodríguez-Fraticelli, M. Auzan, M. A. Alonso, M. Bornens, F. Martín-  
558 Belmonte, Cell confinement controls centrosome positioning and lumen  
559 initiation during epithelial morphogenesis. *The Journal of cell biology* **198**,  
560 1011-1023 (2012).
- 561 8. A. E. Rodríguez-Fraticelli, F. Martín-Belmonte, Mechanical control of  
562 epithelial lumen formation. *Small GTPases* **4**, 136-140 (2013).
- 563 9. Q. Li, Y. Zhang, P. Pluchon, J. Robens, K. Herr, M. Mercade, J. P. Thiery, H. Yu,  
564 V. Viasnoff, Extracellular matrix scaffolding guides lumen elongation by  
565 inducing anisotropic intercellular mechanical tension. *Nature cell biology* **18**,  
566 311-318 (2016).
- 567 10. R. Ramanujam, Z. Han, Z. Zhang, P. Kanchanawong, F. Motegi, Establishment  
568 of the PAR-1 cortical gradient by the aPKC-PRBH circuit. *Nature chemical*  
569 *biology* **14**, 917-927 (2018).
- 570 11. S. C. Wang, T. Y. F. Low, Y. Nishimura, L. Gole, W. Yu, F. Motegi, Cortical  
571 forces and CDC-42 control clustering of PAR proteins for *Caenorhabditis*  
572 *elegans* embryonic polarization. *Nature cell biology* **19**, 988-995 (2017).
- 573 12. F. Motegi, S. Zonies, Y. Hao, A. A. Cuenca, E. Griffin, G. Seydoux, Microtubules  
574 induce self-organization of polarized PAR domains in *Caenorhabditis elegans*  
575 zygotes. *Nature cell biology* **13**, 1361-1367 (2011).
- 576 13. N. Motosugi, T. Bauer, Z. Polanski, D. Solter, T. Hiiragi, Polarity of the mouse  
577 embryo is established at blastocyst and is not prepatterned. *Genes &*  
578 *development* **19**, 1081-1092 (2005).
- 579 14. E. J. Y. Kim, E. Korotkevich, T. Hiiragi, Coordination of Cell Polarity, Mechanics  
580 and Fate in Tissue Self-organization. *Trends in cell biology* **28**, 541-550 (2018).



- 581 15. J. Zenker, M. D. White, M. Gasnier, Y. D. Alvarez, H. Y. G. Lim, S. Bissiere, M.  
582 Biro, N. Plachta, Expanding Actin Rings Zipper the Mouse Embryo for  
583 Blastocyst Formation. *Cell* **173**, 776-791 e717 (2018).
- 584 16. J. L. Maitre, H. Turlier, R. Illukkumbura, B. Eismann, R. Niwayama, F. Nedelec,  
585 T. Hiiragi, Asymmetric division of contractile domains couples cell positioning  
586 and fate specification. *Nature* **536**, 344-348 (2016).
- 587 17. A. F. Baas, J. Kuipers, N. N. van der Wel, E. Batlle, H. K. Koerten, P. J. Peters,  
588 H. C. Clevers, Complete polarization of single intestinal epithelial cells upon  
589 activation of LKB1 by STRAD. *Cell* **116**, 457-466 (2004).
- 590 18. S. S. Ng, K. Saeb-Parsy, S. J. I. Blackford, J. M. Segal, M. P. Serra, M. Horcas-  
591 Lopez, D. Y. No, S. Mastoridis, W. Jassem, C. W. Frank, N. J. Cho, H. Nakauchi,  
592 J. S. Glenn, S. T. Rashid, Human iPSC derived progenitors bioengineered into  
593 liver organoids using an inverted colloidal crystal poly (ethylene glycol)  
594 scaffold. *Biomaterials* **182**, 299-311 (2018).
- 595 19. S. J. I. Blackford, S. S. Ng, J. M. Segal, A. J. F. King, A. L. Austin, D. Kent, J.  
596 Moore, M. Sheldon, D. Ilic, A. Dhawan, R. R. Mitry, S. T. Rashid, Validation of  
597 Current Good Manufacturing Practice Compliant Human Pluripotent Stem  
598 Cell-Derived Hepatocytes for Cell-Based Therapy. *Stem cells translational  
599 medicine* **8**, 124-137 (2019).
- 600 20. Y. Kouji, T. Kido, T. Ito, H. Oyama, S.-W. Chen, Y. Katou, K. Shirahige, A.  
601 Miyajima, An In Vitro Human Liver Model by iPSC-Derived Parenchymal and  
602 Non-parenchymal Cells. *Stem cell reports* **9**, 490-498 (2017).
- 603 21. A. A. Palakkan, J. Nanda, J. A. Ross, Pluripotent stem cells to hepatocytes, the  
604 journey so far. *Biomedical reports* **6**, 367-373 (2017).
- 605 22. S. S. Bale, S. Geerts, R. Jindal, M. L. Yarmush, Isolation and co-culture of rat  
606 parenchymal and non-parenchymal liver cells to evaluate cellular interactions  
607 and response. *Scientific reports* **6**, 25329 (2016).
- 608 23. J. Gu, X. Shi, Y. Zhang, X. Chu, H. Hang, Y. Ding, Establishment of a three-  
609 dimensional co-culture system by porcine hepatocytes and bone marrow  
610 mesenchymal stem cells in vitro. *Hepatology research : the official journal of  
611 the Japan Society of Hepatology* **39**, 398-407 (2009).
- 612 24. B. Tsuchiya, Y. Sato, T. Kameya, I. Okayasu, K. Mukai, Differential expression  
613 of N-cadherin and E-cadherin in normal human tissues. *Archives of histology  
614 and cytology* **69**, 135-145 (2006).
- 615 25. L. Limozin, K. Sengupta, Quantitative reflection interference contrast  
616 microscopy (RICM) in soft matter and cell adhesion. *Chemphyschem : a  
617 European journal of chemical physics and physical chemistry* **10**, 2752-2768  
618 (2009).
- 619 26. N. Tsukada, C. A. Ackerley, M. J. Phillips, The structure and organization of  
620 the bile canalicular cytoskeleton with special reference to actin and actin-  
621 binding proteins. *Hepatology* **21**, 1106-1113 (1995).
- 622 27. T. Wang, K. Yanger, B. Z. Stanger, D. Cassio, E. Bi, Cytokinesis defines a spatial  
623 landmark for hepatocyte polarization and apical lumen formation. *Journal of  
624 cell science* **127**, 2483-2492 (2014).
- 625 28. Á. Román-Fernández, J. Rognot, E. Sandilands, M. Nacke, M. A. Mansour, L.  
626 McGarry, E. Shanks, K. E. Mostov, D. M. Bryant, The phospholipid PI(3,4)P2 is  
627 an apical identity determinant. *Nature Communications* **9**, 5041 (2018).



- 628 29. X. Gao, C. Stoecklin, Y. Zhang, Z. Weng, R. De Mets, G. Greci, V. Viasnoff,  
629 Artificial Micronic Array with Spatially Structured Biochemical Cues.  
630 *Methods in molecular biology* **1771**, 55-66 (2018).
- 631 30. T. Masters, W. Engl, Z. L. Weng, B. Arasi, N. Gauthier, V. Viasnoff, Easy  
632 fabrication of thin membranes with through holes. Application to protein  
633 patterning. *PloS one* **7**, e44261 (2012).
- 634 31. N. R. F. Hannan, C.-P. Segeritz, T. Touboul, L. Vallier, Production of  
635 hepatocyte-like cells from human pluripotent stem cells. *Nature protocols* **8**,  
636 430-437 (2013).
- 637 32. B. Quistorff, J. Dich, N. Grunnet, Preparation of isolated rat liver hepatocytes.  
638 *Methods in molecular biology* **5**, 151-160 (1990).
- 639
- 640

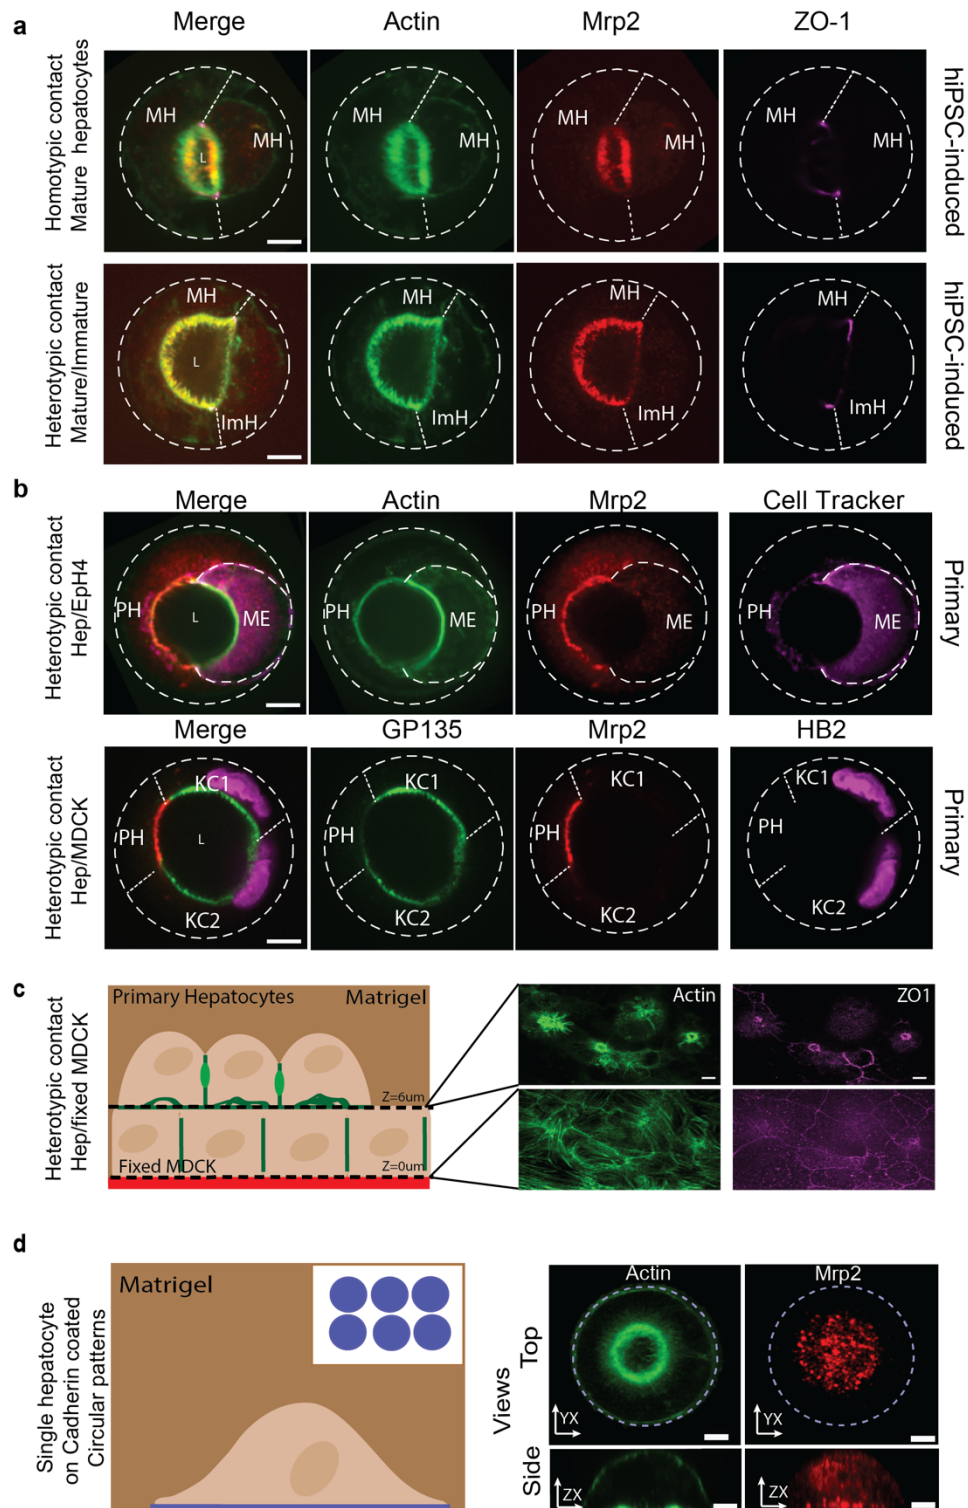

641

642 **Figure 1 : Hepatocytes are able to form lumens with different types of substrates.**

643 **a**, Overlay of confocal images of the lumen (L) created inside a microwell between

644 mature (MH) and immature hepatocytes (ImH) stained for Actin (green), Mrp2 (red)

645 and ZO-1 (magenta) respectively. The well wall and cell junction has been delimited

646 by dashed lines. Scale bar = 10µm. **b**, Representative confocal images of the lumen

647 (L) created inside a microwell between primary hepatocyte (PH) and different cell

648 lines such as mammary epithelial cells (Eph4, ME) or kidney cells (MDCK, KC) stained

649 with Mrp2 (red), actin/golgi (green) and cell tracker/histones (magenta). Scale bar =  
650 10 $\mu$ m. **c**, Left, side view illustration of the co-culture of fixed MDCK with primary  
651 hepatocytes. Right, confocal images of actin (green) and ZO-1 circular structures  
652 (magenta) at the interface between primary hepatocytes and fixed MDCK (Z=6 $\mu$ m)  
653 after 24h of seeding, and between fixed MDCK with the coverslip (Z=0 $\mu$ m). Scale bar  
654 = 10 $\mu$ m. **d**, Left, Side view illustration of single cell primary hepatocytes. Right,  
655 Immunostaining of actin (green) and Mrp2 (red) of primary hepatocytes on an E-  
656 cadherin island covered with matrigel reveal an actin ring located at the interface  
657 with the coverslip and a preferential localisation of Mrp2 above the actin ring. Scale  
658 bar = 10 $\mu$ m.  
659

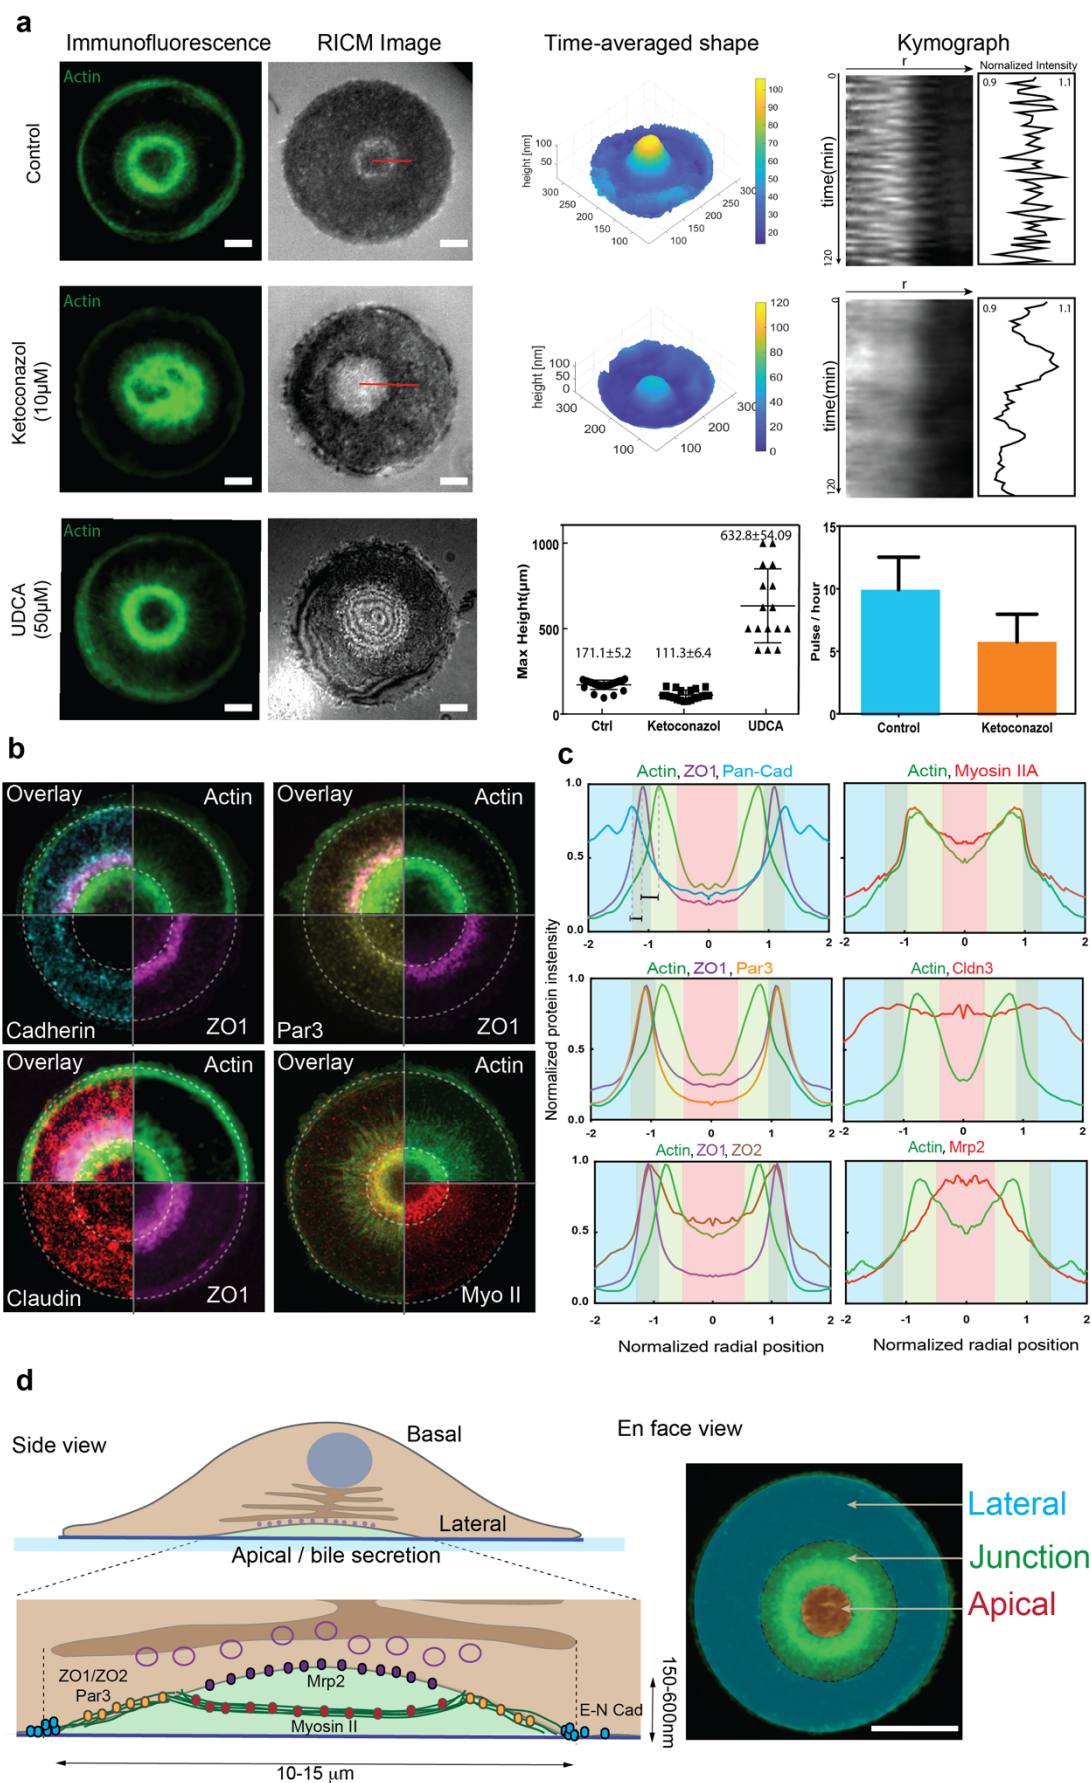

662 **Figure 2 : Characterisation of protein organization and behaviour of single-cell**  
663 **hemi-lumen.**

664 **a, Left**, immunostaining and RICM images of single-cell liver following different drug  
665 treatments. **Right**, quantification of height and pulsation behaviour under the three  
666 different treatments. Reduction of bile secretion by ketoconazole induces a  
667 homogeneous bright circle that is smaller, and with a slow pulsation compared to  
668 control. Boosting secretion by UDCA induces an inflation of the lumen resulting in  
669 multiple interference rings on the RICM images.  $N_{ctrl}=25$ ,  $N_{ket}=20$ ,  $N_{UDCA}=16$ , Scale bar  
670 =  $10\mu m$ . **b** and **c**, Montage and quantification of confocal images of the hemi-lumen  
671 stained for structural and polarity markers illustrates the spatial localisation of the  
672 different rings of proteins around the lumen. For quantification, the centre of the  
673 lumen is considered as 0 while the edge of the actin ring is considered as 1. The red,  
674 dark green, light green and blue background correspond to the region described in d.  
675 **d**, Side and en face view illustration of the position of the different proteins studied  
676 and discretisation of the cell-coverslip interface in four regions. The apical pole (red  
677 region) is delimited by the actin ring (light green region). As well as containing actin,  
678 this inner ring is rich in myosin IIA. Moving outwards, rings of ZO1/ZO2 and Par3 are  
679 found (dark green region, followed by cell-cell contacts labelled by E-cadherin (blue  
680 region). E-cadherin is not observed from the centre of the lumen out to the ZO1/ZO2  
681 ring. Mrp2 is mostly located above the apical pole. In this system, claudins did not  
682 exhibit any specific localisation. Scale bar =  $20\mu m$ ,  $N_{ActZO1Cad}=9$ ,  $N_{ActMyosin}=14$ ,  
683  $N_{ActZO1Par3}=17$ ,  $N_{ActCldn3}=10$ ,  $N_{ActZO1ZO2}=5$ ,  $N_{ActMrp2}=11$ .

684  
685



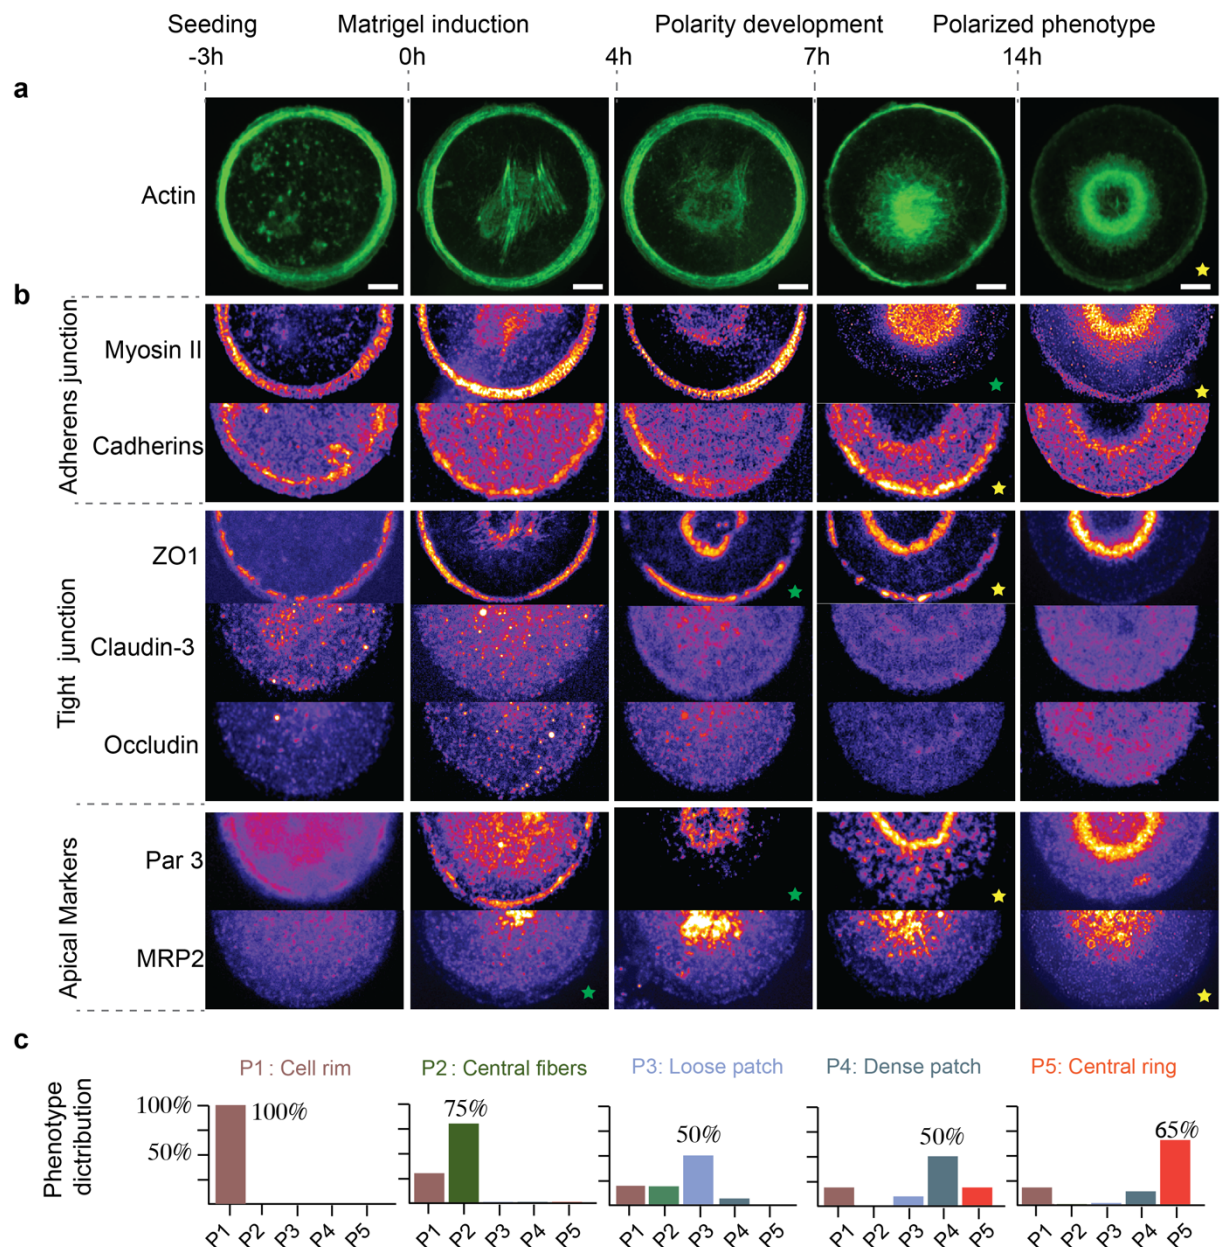

686

687

**Figure 3: Actin and hepatic polarity related proteins undergo extensive reorganization throughout polarity establishment.**

688

**a**, Representative Structured Illumination Microscopy (SIM) images showing the formation of an actin ring around the apical pole of single hepatocytes situated on E-cadherin circular patterns fixed at 3 hours before, and then 0, 4, 7, 10 and 14 hours after matrigel addition. Scale bar, 5 $\mu$ m. **b**, Representative SIM images of adherens junction associated proteins (Cadherins and Myosin II), cytosolic and transmembrane components of tight junction (ZO-1, claudin-3 and, occludin), apical markers (Par3 and MRP2) at five stages of polarity development. **c**, Fraction of cells displaying typical phenotypes of each development phase fixed at different time points. Based on the actin organization, five phases are defined as indicated. The number of cells analyzed was pooled from n = 3 independent experiments (N= 42 for P1, N= 65 for P2, N= 56 for P3, N= 66 for P4, N= 72 for P5).

700

701



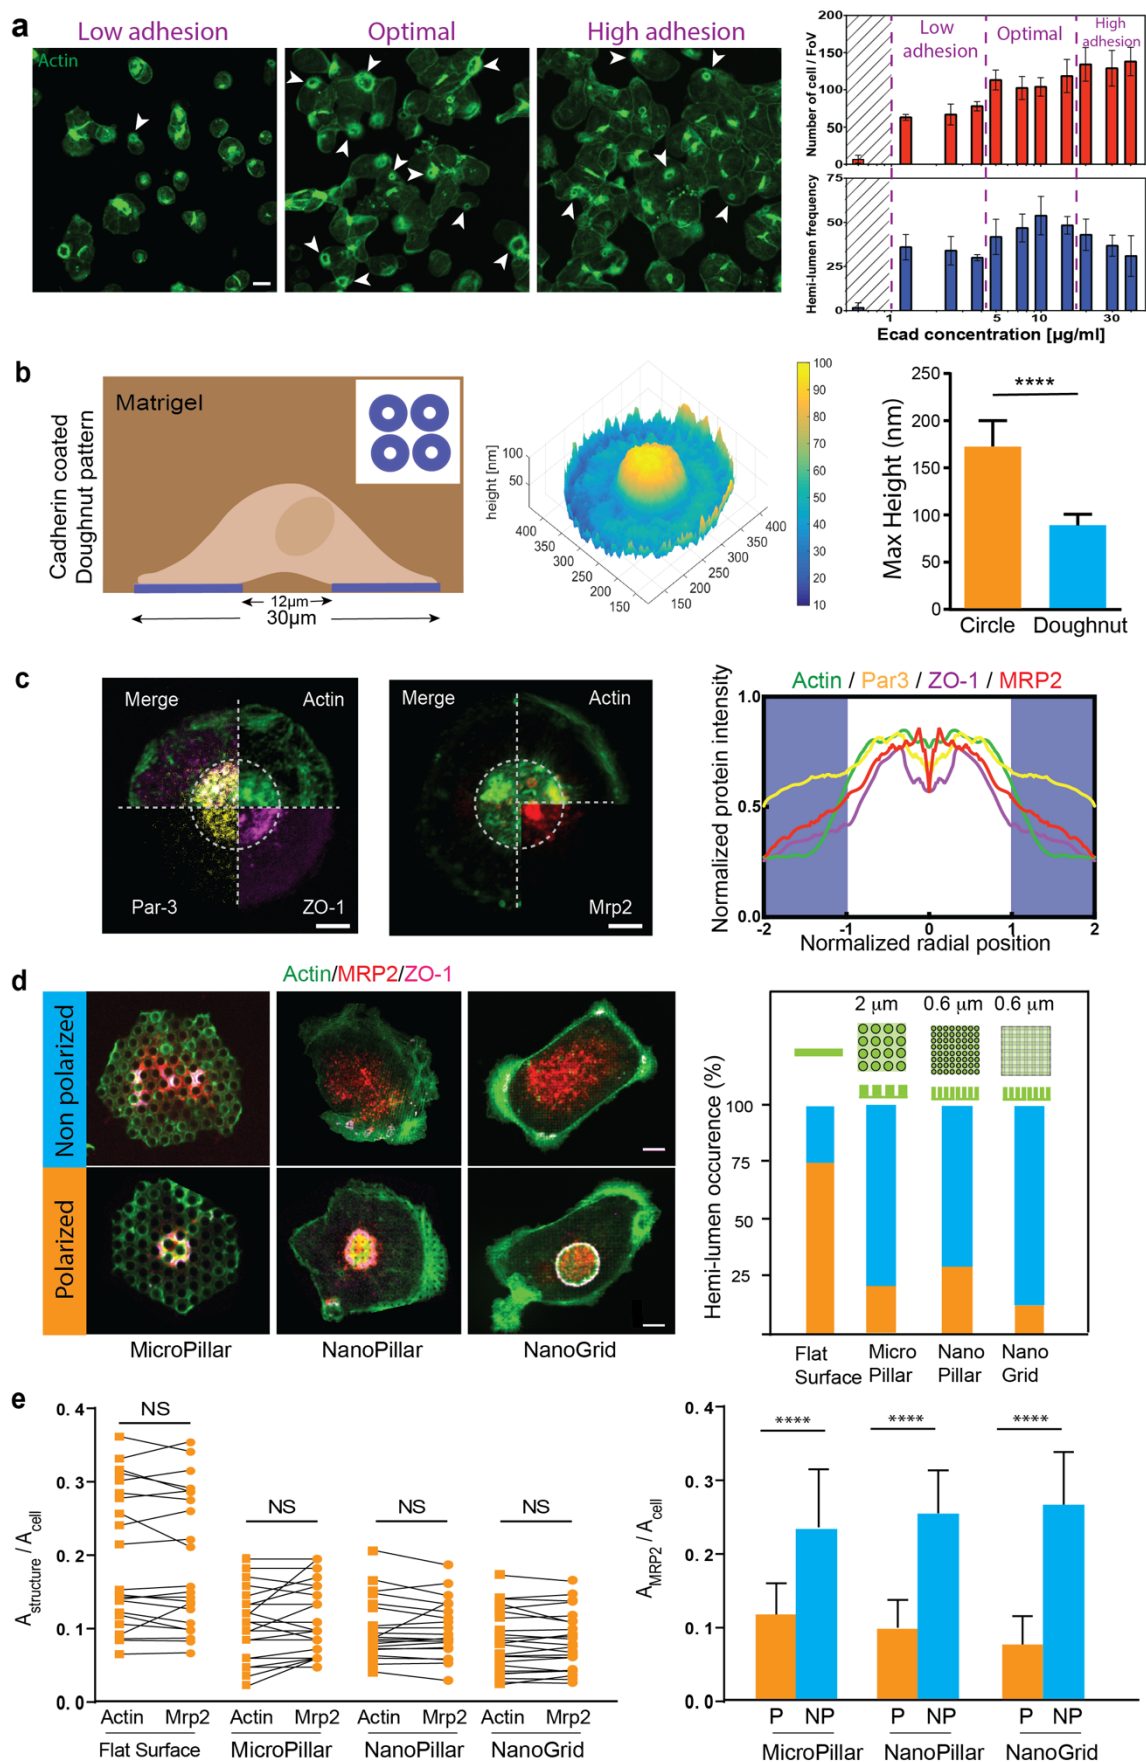



704 **Figure 4 : Cadherin-distribution-dependent actin organization is critical for apico-**  
705 **basal polarity establishment.**

706 **a**, Low magnification images of primary hepatocytes stained for actin after seeding  
707 on different concentrations of E-cadherin. A minimum threshold of E-cadherin  
708 concentration is required for the cells to attach, illustrated by the shaded region on  
709 the right graph. The number of cells attaching increases with the concentration of E-  
710 cadherin above this threshold value. The frequency of hemi-lumen formation  
711 reaches an optimum at 10 $\mu$ g/ml E-cadherin, above which the cells preferentially  
712 form lumens between each other. White arrows point to representative hemi-  
713 lumens. Experiments have been performed on 12 fields of views in 4 independent  
714 experiments for each concentration. Scale bar, 10 $\mu$ m. **b, Left panel:** Schematic of the  
715 geometry and dimensions of the E-cadherin coated doughnut pattern. **Middle panel:**  
716 Representative heat map showing the height of plasma membrane to the coverslip  
717 measured from reflective interference contrast microscopy (RICM) image on  
718 doughnut pattern of e-cadherin. **Right panel:** Maximum height of plasma membrane  
719 quantified from RICM images of primary hepatocytes on E-cadherin circular (n=28)  
720 and doughnut (n=14) patterns. \*\*\*\*, p<0.0001. **c**, Representative fluorescence  
721 images showing the actin, ZO-1, Par3 (left) and actin, MRP2 (middle) localized on the  
722 plasma membrane/E-cadherin interface. Scale bar: 5 $\mu$ m. Quantification of actin, ZO-  
723 1, Par3, MRP2 distribution in relation to the position of the non-adhesive region  
724 (white) and E-cadherin coated region (Purple), n= 16 for cells stained with actin, ZO-1  
725 and Par3, n=11 for cells stained with actin and MRP2. Despite the creation of a  
726 lumen-like structure on doughnut pattern, no specific localization of apical markers  
727 has been identified.

728 **d**, Representative immunofluorescence images showing perturbation of Actin, MRP2  
729 and ZO-1 distribution in hepatocytes with either a disorganized central actin  
730 phenotype (top, non-polarized NP) or with central actin ring phenotype (below,  
731 polarized P) when seeded on micropillar, nanopillar, and nanogrid substrates coated  
732 with E-cadherin. Scale bar, 5 $\mu$ m. Quantification of hemi-lumen occurrence in cells on  
733 flat surface and on textured substrates as indicated (N= 53, 82, 81 and 100 for flat,  
734 micropillar, nanopillar, and nanogrid, respectively). Schematics show the dimension  
735 of each texture. The number of cells analyzed was pooled from 4 independent  
736 experiments.

737 **e**, Quantification of the ratio of the area of the central actin ring and MRP2 ( $A_{structure}$ )  
738 to the cell area ( $A_{cell}$ ) for polarized primary hepatocytes seeded on flat surface  
739 (n=22), micropillar (n=25), nanopillar (n=20) and nanogrid (n=24). Black lines pair the  
740 ratio measured for actin and MRP2 in the same hepatocyte. Quantification of the  
741 ratio of the area of MRP2 to the cell area of polarized (P) and non-polarized cells  
742 (NP) seeding on micropillar, nanopillar and nanogrid (n=24-35), \*\*\*\*, p<0.0001.

743

744

745

746

## Supplementary Figures

747

748

### 749 Autonomous induction of hepatic polarity to construct single cell liver.

750 Yue Zhang<sup>1</sup>, Richard de Mets<sup>1</sup>, Cornelia Monzel<sup>2</sup>, Pearlyn Toh<sup>1</sup>, Noemi Van Hul<sup>3,4</sup>,

751 Soon Seng Ng<sup>5</sup>, S.Tamir Rashid<sup>5,6</sup>, Virgile Viasnoff<sup>1,7,8</sup>

752

753

754

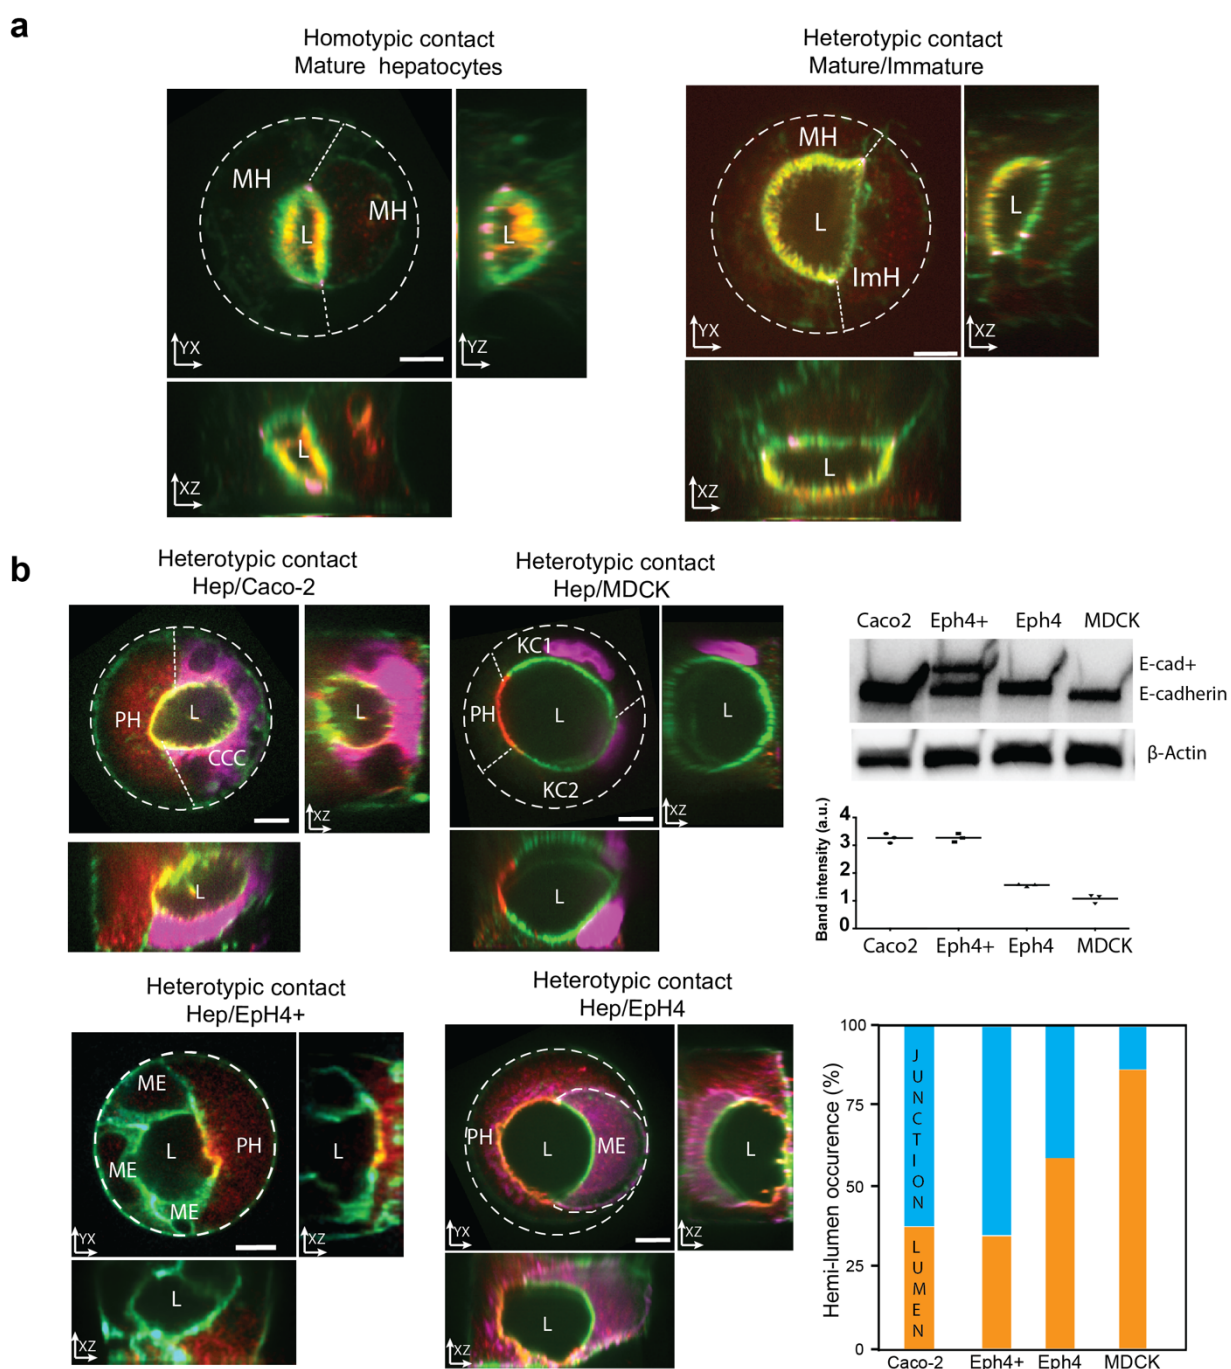

755

756 **Supplementary Figure 1:**

757 **Orthogonal views of heterodoublets forming lumen-like structures. a,** Orthogonal  
758 views of representative images for Figure 1 showing lumens formed between mature  
759 (MH) and immature (ImH) hiPSC derived hepatocyte. MRP2 (red) is exclusively  
760 recruited to the apical domain of mature hepatocytes. Dash lines indicate the cell-  
761 cell contacts. **b,** Top and side views of heterodoublets between primary rat  
762 hepatocytes (PH) and different epithelial cell lines (MDCK, Eph4, EPH4+Ecad,Caco2).  
763 Discrimination between cell types was performed using prestaining before the  
764 formation of the doublets. Caco2 and Eph4 cell lines were pre stained using cell  
765 tracker, Eph4+ expressed E-cad GFP and Actin is in green, MDCK expressed H2B-GFP.  
766 E-cadherin levels in each cell lines were assessed by three indepednetn westernblot.  
767 The hemi-lumen occurrence is inversely correlated to expression levels of E-  
768 cadherin. Scale bar, 5 $\mu$ m.  $N_{Caco2} = 29$  (38%),  $N_{Eph4+} = 20$  (35%),  $N_{Eph4} = 56$  (59%),  
769  $N_{MDCK} = 53$  (87%),  
770

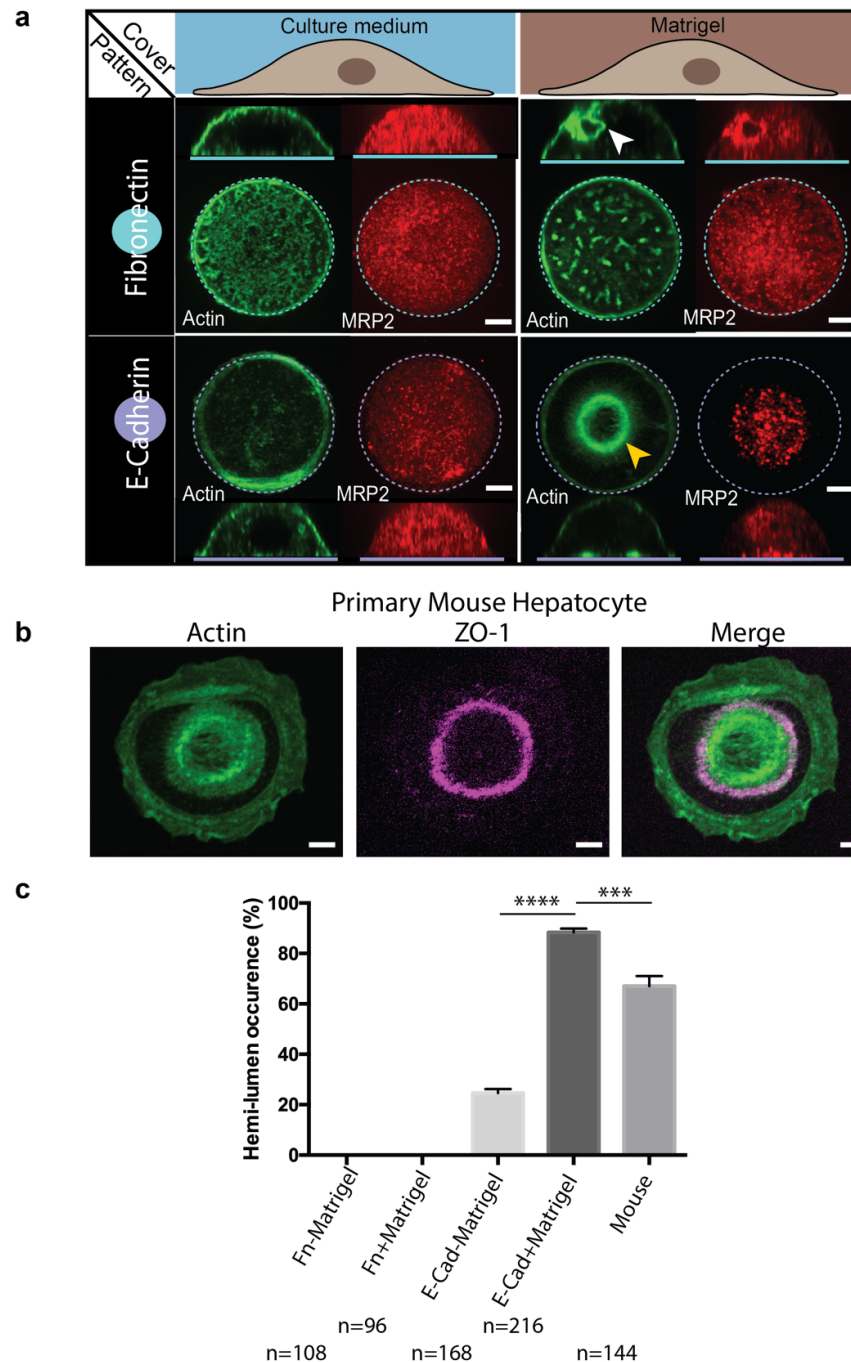

771

772

**Supplementary Figure 2:**

773

**Combination of Cadherin and ECM signalling are necessary to form hemi-lumen in**

774

**large proportion of hepatocytes. a, Representative immunostaining images showing**

775

the top and side view of single hepatocytes cultured in four distinct

776

microenvironments as indicated by the diagram. Scale bar, 5 $\mu$ m. **b, Representative**

777

image showing that primary mouse hepatocyte are capable of forming similar actin

778

(Green) structure with ZO-1(purple) exclusively recruited to the contour as rat

779

hepatocyte when cultured on E-Cadherin coated island and and overlaid with 6%

780

matrigel. Scale bar, 5 $\mu$ m. **c, Fraction of cells displaying central actin structure and**

781

polarity phenotype in conditions described in a, b. The data of rat and mouse

782

hepatocyte is collected from 3 and 2 independent experiments respectively. \*\*\*, p

783

value < 0.001, \*\*\*\*, p value < 0.0001.



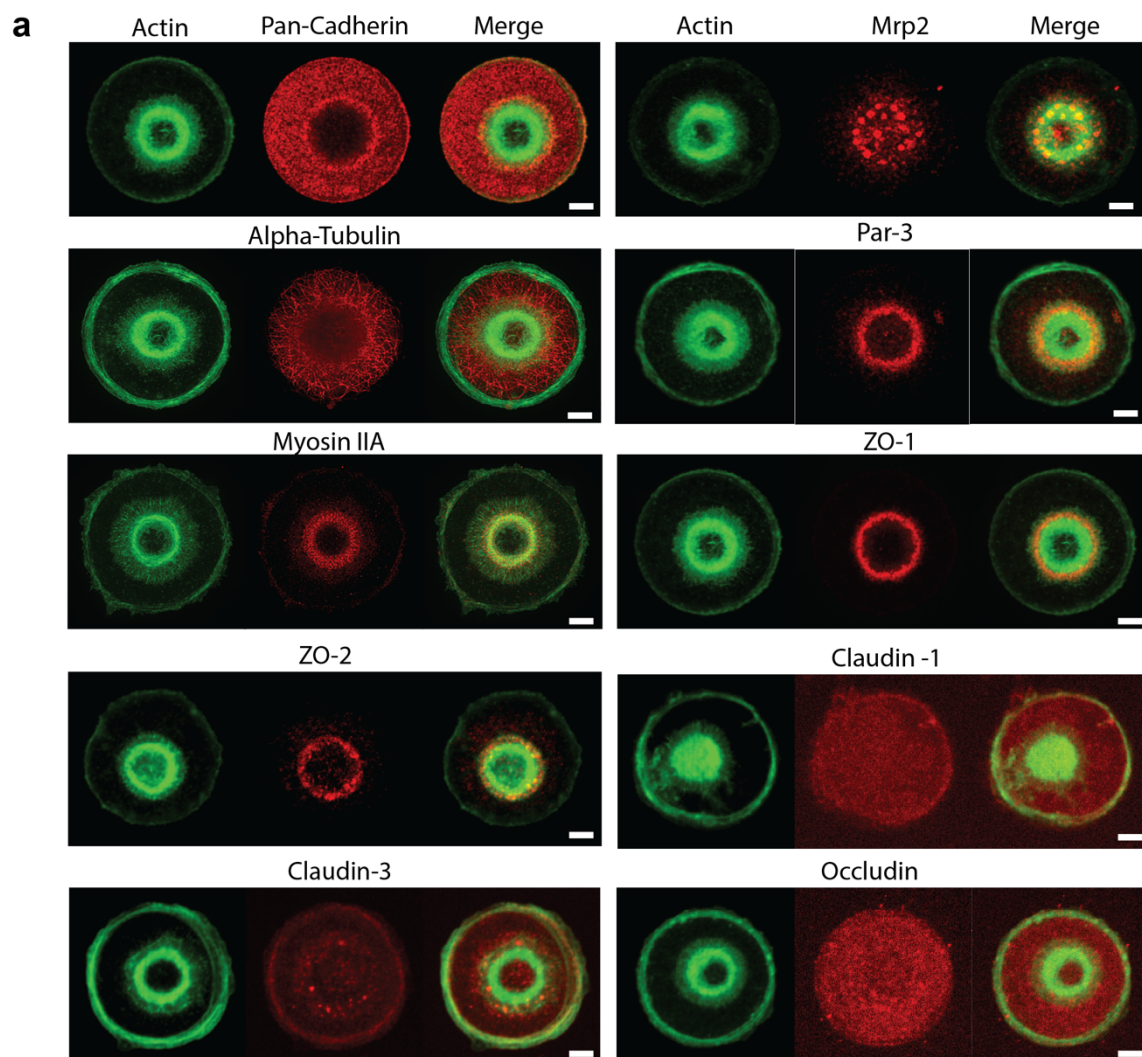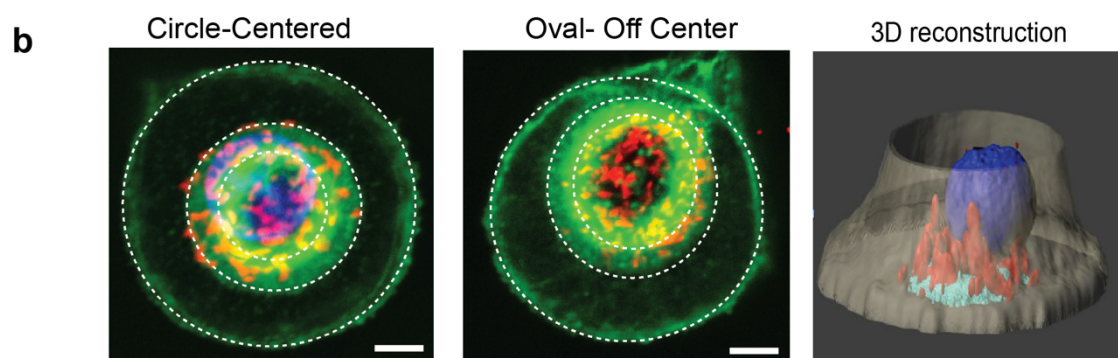

DAPI | Actin | Grasp 65

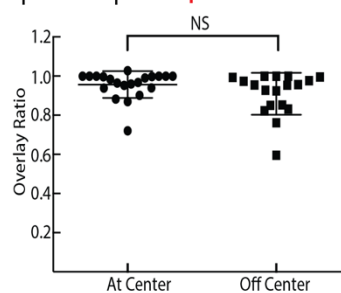

784  
785  
786

787 **Supplementary Figure 3:**

788 **The distribution of polarity markers protein and organelles in hemi-lumen. a,** Split  
789 color images for Fig. 2b. Representative immunofluorescence images of ZO-2,  
790 Claudin-1, Occludin and Alpha-Tubulin that are not presented on Fig 2b. Scale bar,  
791 5 $\mu$ m. **b,** Representative images showing relative location of actin structure (green)  
792 and maximum Z projection of Golgi staining (by Grasp65 in red) in the cases when  
793 the hemi-lumens at the centre or side of cell/substrate interface. 3D reconstruction  
794 (middle) of image stack for left panel showing the Golgi(red) is situated right above  
795 lumen area (Cyan). Plots (right) showing the projection of Golgi structure highly  
796 overlapped with lumen area . We do not observe any significant difference between  
797 both cases of lumen location. n=21 for centered lumen at centre, n=19 for off-  
798 centered lumen.

799

800

801

802

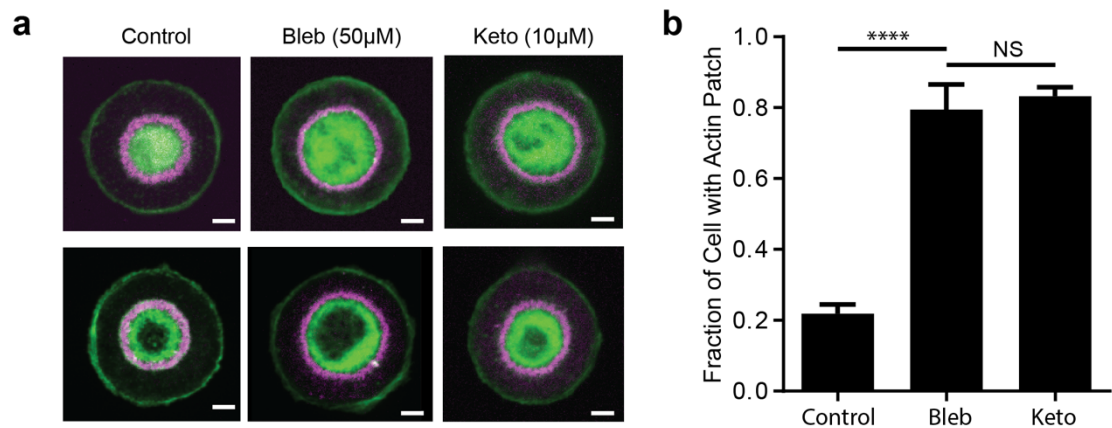

803

804

**Supplementary Figure 4:**

805 **Inhibition of actomyosin contractility or of bile acid synthesis hinders the**

806 **reorganization of the actin structures from dense patches to rings. a,**

807 Representative images of actin (green) and ZO-1 (purple) for both patch (top) and

808 ring (bottom) morphologies in control, 50µM blebbistatin (Blebb) and 10µM

809 ketoconazole (Keto) treated hepatocytes. Scale bar: 5µm **b,** Fraction of cells with

810 dense patch actin structures at steady state is significantly increased after

811 blebbistatin or ketoconazole treatments. Bar chart shows the mean±SD from 3

812 independent experiments (n=146, n=129, and n=108 cells in control, Bleb

813 (Blebbistatin) and Keto (Ketoconazol) group respectively). \*\*\*\*, p<0.0001, NS, not

814 significant. Two-sided unpaired t-test was performed to calculate p value.

815

816

817

818

819

820

821

822

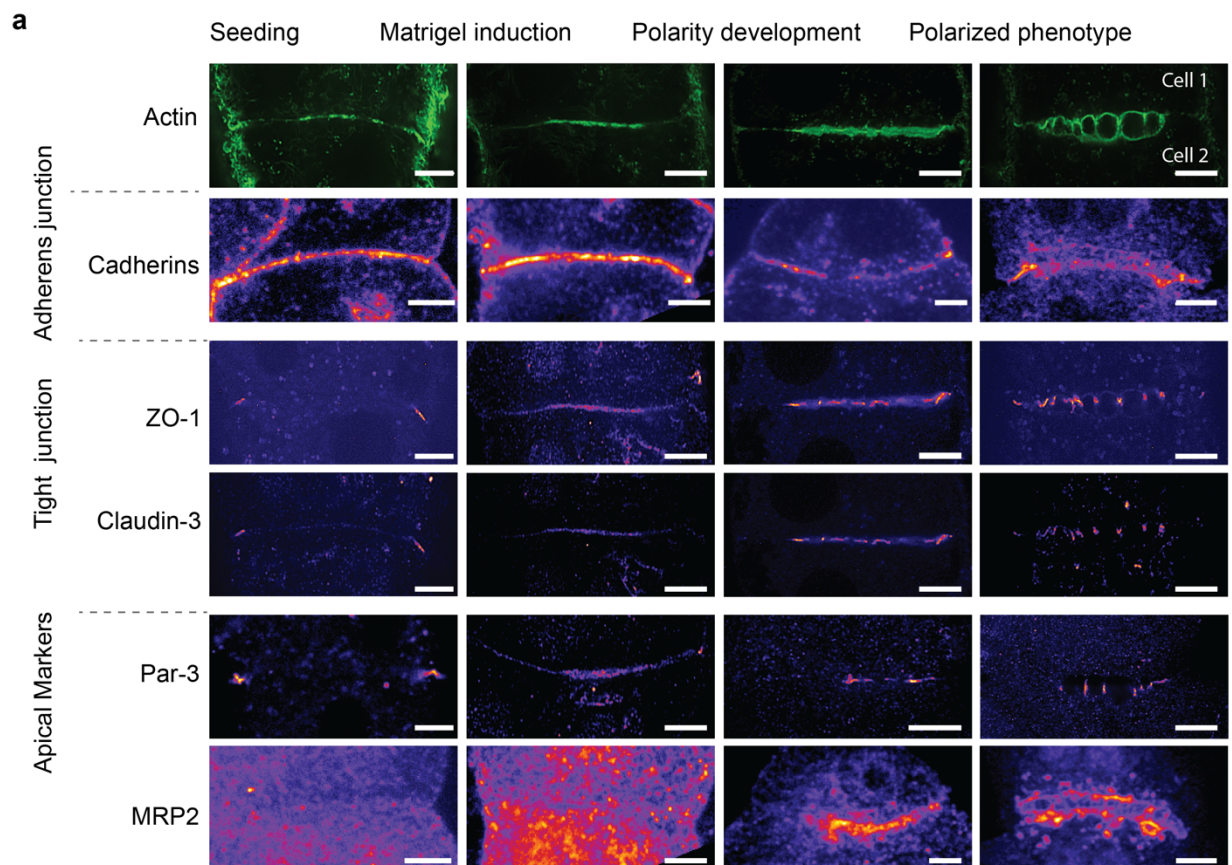

823

824

**Supplementary Figure 5:**

825

**Evolution of the distribution of polarity markers around the cell-cell interface during *in vivo* polarisation.**

826

827

Representative structure illumination microscopy (SIM) images of actin and hepatic polarity related proteins for bile canaliculi formed a lumen between two primary hepatocytes at different stages of polarity development. Actin, cadherin and ZO1 and Claudin 3 images are obtained from quadruple immunostaining of the cells. Par 3 and MRP2 images are obtained from cells with similar actin morphologies.

832

833

834



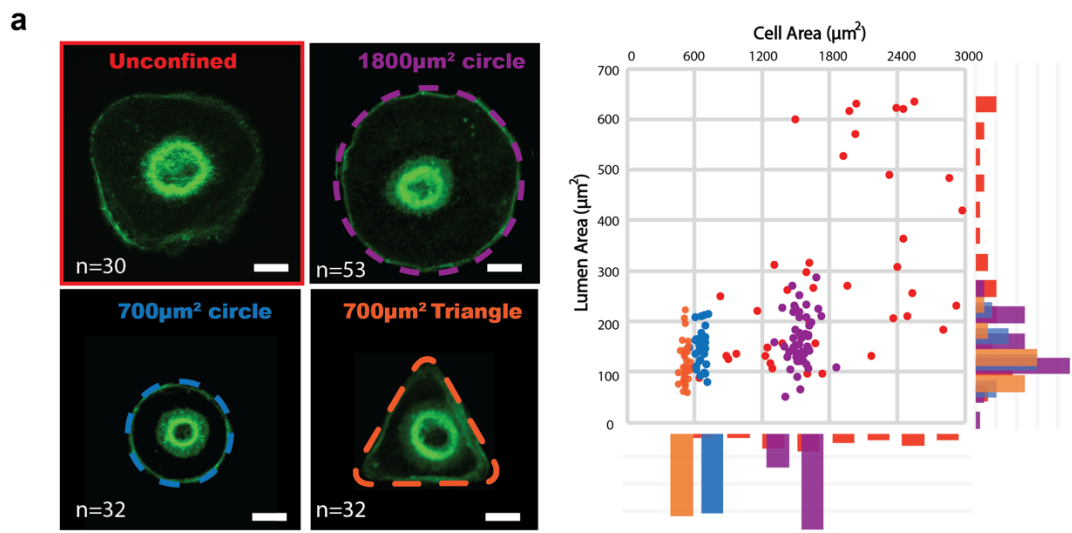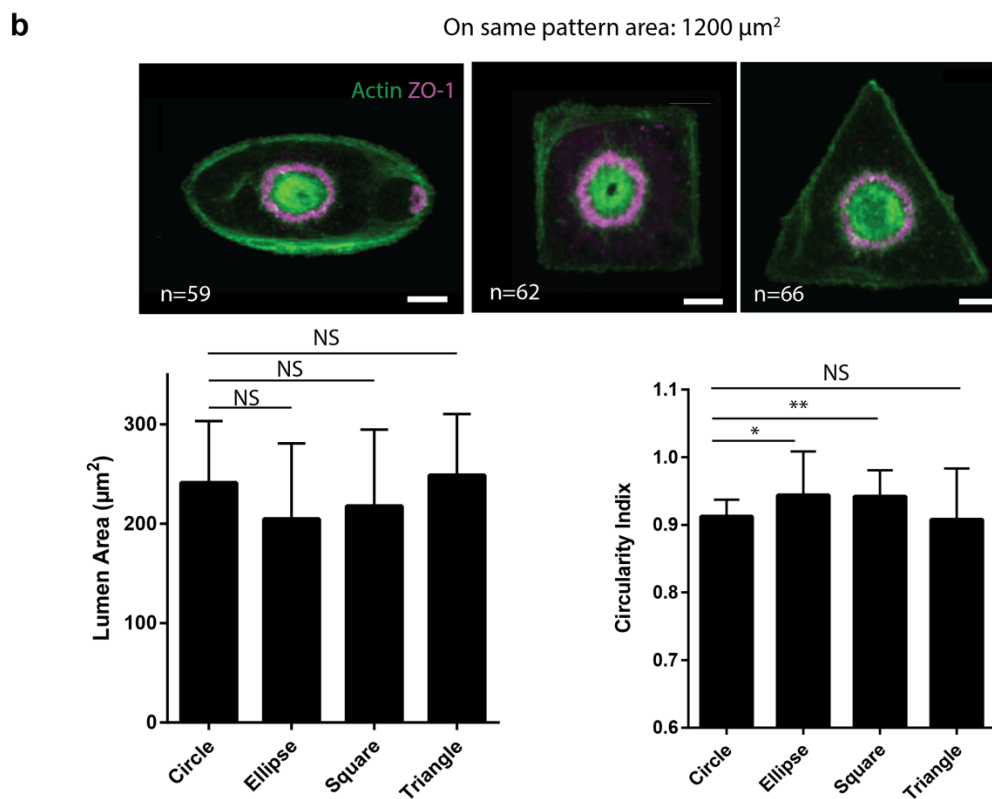

835

836

**Supplementary Figure 6:**

837

**The hemi-lumen size and shape are relatively independent of the cell spreading**

838

**area and geometry. a, Left panel:** representative images of actin (green) showing

839

the sizes and shapes of hemi-lumens formed by hepatocytes spreading on E-

840

Cadherin coated surface with different areas. The patterns are outlined by coloured

841

dashed lines. Scale bar:  $5\mu\text{m}$ . **Right panel:** Distribution of lumens area vs and cell

842

area. Data from cells on different spreading areas or geometries are color-coded

843

corresponding to the color of the pattern outlines depicted on the left panel. The

844

data are pooled from 3 independent experiments. **b, Top:** typical central actin and

845

ZO-1 staining of hepatocyte seeding on elliptic, square and triangular pattern with

846

area of  $1200\mu\text{m}^2$ . **bottom:** bar charts showing the lumen area (left) and circularity

847 index (right) of hemi-lumen in cells confined on different cell geometry. NS, not  
848 significant, \*\*,  $p < 0,01$ , \*,  $p < 0,05$ .

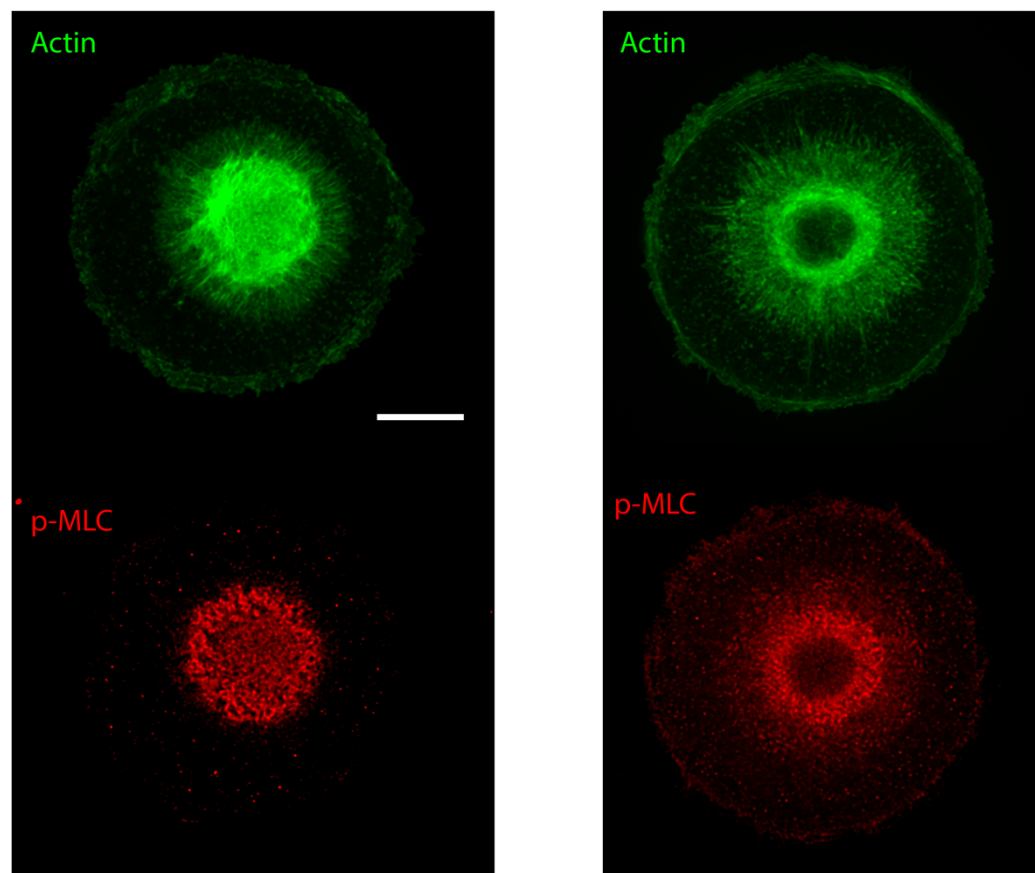

849

850 **Supplementary Figure 7:**

851 **Actin and Myosin organization during hemi-lumen formation imaged with**  
852 **structured illumination microscopy (SIM). Left,:** Superresolved image of the Actin  
853 patch of phase P4 (Green) and phospho Myosin light chain localization. The radial  
854 fibers around the patch are largely deprived of p-MLC while the dense actin  
855 structure in the centre display myosin minifilaments. **Right:** Actin ring in phase P5.  
856 The ring concentrate most of the actomyosin complexes, indicating a local  
857 contractility. Scale bar = 10 $\mu$ m

858

859 **Caption Supplementary movies:**

860

861 **Supplementary Movie 1:** live RICM imaging of the hemi-lumen in control conditions.

862 Note the central ring that moves radially indicating a dome shape structure of about

863 200 nm height on top of the coverslip.

864

865 **Supplementary Movie 2:** live RICM imaging of the hemi-lumen under Ketokonazole

866 10  $\mu$ M. The inhibition of bile secretion leads to a large reduction of vertical

867 fluctuation (amplitude and frequency). The fluctuations are no longer radial (lumen

868 pulsating) but rather diffused and lateral, indicating a mere membrane fluctuation.

869

870 **Supplementary Movie 3:** live RICM imaging of the hemi-lumen in UDCA (40 $\mu$ M)

871 treated cells. This treatment stimulates bile salt secretion. Multiple interference

872 rings in the center of the lumen indicates a much-inflated geometry compared to

873 control case.

874

875 **Supplementary Movie 4:** live RICM imaging of the hemi-lumen on doughnut

876 patterns in control conditions. The central fluctuations are fully random compared to

877 disc patterns. It indicates the absence of coordinated pulsations that are replaced by

878 simple fluctuations of the free membrane.

879

880

881

882
